# Supplementary material for: The Pheromone Module SteC-MkkB-MpkB-SteD-HamE Regulates Development, Stress Responses and Secondary Metabolism in Aspergillus fumigatus
Source: Front Microbiol. 2020 May 7;11:811. doi: 10.3389/fmicb.2020.00811 (PMC7223695; doi:10.3389/fmicb.2020.00811)
Supplement: Supplementary file 6 [file Table_5.XLSX]

## Sheet: Sheet1
Table S5: Aspergillus fumigatus MkkB-GFP interacting proteins (Vegetative growth-24 hours)
Accession	Description	Score	Coverage	# Proteins	# Unique Peptides	# Peptides	# PSMs	# AAs	MW [kDa]	calc. pI
Afu3g05900	ste7 AspGDID:ASPL0000105003 COORDS:Chr3_A_fumigatus_Af293:1444958-1446786W, translated using codon table 1 (536 amino acids) Uncharacterized ORF; MAP kinase kinase (MAPKK)	374.547	71.08	1	29	29	87	536	58.482	9.0708
Afu5g06420	Afu5g06420 AspGDID:ASPL0000107718 COORDS:Chr5_A_fumigatus_Af293:1549998-1553242W, translated using codon table 1 (1007 amino acids) Uncharacterized ORF; Ortholog(s) have MAP kinase kinase kinase activity, SAM domain binding activity	350.228	63.26	1	50	50	83	1007	111.606	8.60205
Afu1g12680	Afu1g12680 AspGDID:ASPL0000102336 COORDS:Chr1_A_fumigatus_Af293:3351052-3347476C, translated using codon table 1 (1072 amino acids) Uncharacterized ORF; Ortholog(s) have Rho GTPase activator activity	252.718	51.59	1	43	43	60	1072	117.677	6.771
Afu2g17130	Afu2g17130 AspGDID:ASPL0000104429 COORDS:Chr2_A_fumigatus_Af293:4574963-4576567W, translated using codon table 1 (487 amino acids) Uncharacterized ORF; Ortholog(s) have protein kinase regulator activity	147.098	62.42	1	22	22	34	487	53.4666	6.13818
Afu1g07090	Afu1g07090 AspGDID:ASPL0000101875 COORDS:Chr1_A_fumigatus_Af293:2015732-2011032C, translated using codon table 1 (1526 amino acids) Uncharacterized ORF; Ortholog of <i>A. nidulans FGSC A4</i> : AN5154, <i>A. niger CBS 513.88</i> : An07g09710, <i>A. oryzae RIB40</i> : AO090012000961, <i>Aspergillus wentii</i> : Aspwe1_0155743 and <i>Aspergillus sydowii</i> : Aspsy1_0134266	127.986	30.01	1	31	31	33	1526	164.391	6.65381
Afu2g02770	Afu2g02770 AspGDID:ASPL0000103107 COORDS:Chr2_A_fumigatus_Af293:716490-719616W, translated using codon table 1 (1008 amino acids) Uncharacterized ORF; Ortholog of <i>A. nidulans FGSC A4</i> : AN4545, <i>A. oryzae RIB40</i> : AO090026000849, <i>Aspergillus wentii</i> : Aspwe1_0105973, <i>Aspergillus sydowii</i> : Aspsy1_0059271 and <i>Aspergillus terreus NIH2624</i> : ATET_09613	48.4824	21.92	1	13	13	14	1008	109.228	10.1841
Afu5g13970	Afu5g13970 AspGDID:ASPL0000108448 COORDS:Chr5_A_fumigatus_Af293:3651112-3656167W, translated using codon table 1 (1593 amino acids) Uncharacterized ORF; Ortholog(s) have role in conidiophore development, hyphal growth, sporocarp development involved in sexual reproduction, syncytium formation by plasma membrane fusion	47.7973	13.12	1	12	12	13	1593	173.986	9.74463
Afu4g11830	Afu4g11830 AspGDID:ASPL0000106891 COORDS:Chr4_A_fumigatus_Af293:3122796-3124999W, translated using codon table 1 (713 amino acids) Uncharacterized ORF; Ortholog(s) have U2-type spliceosomal complex localization	41.5954	23.98	1	10	10	10	713	83.3627	7.12256
Afu5g02160	Afu5g02160 AspGDID:ASPL0000107396 COORDS:Chr5_A_fumigatus_Af293:552208-549993C, translated using codon table 1 (613 amino acids) Uncharacterized ORF; Ortholog(s) have nucleolus localization	31.1992	17.78	1	7	7	8	613	65.768	7.34229
Afu5g02770	Afu5g02770 AspGDID:ASPL0000107457 COORDS:Chr5_A_fumigatus_Af293:729618-731162W, translated using codon table 1 (514 amino acids) Uncharacterized ORF; Ortholog of <i>A. nidulans FGSC A4</i> : AN8116, <i>A. niger CBS 513.88</i> : An02g09830, <i>A. oryzae RIB40</i> : AO090102000396, <i>Aspergillus wentii</i> : Aspwe1_0029998 and <i>Aspergillus sydowii</i> : Aspsy1_0050460	27.1421	14.98	1	5	5	6	514	56.2979	8.52881
Afu3g11480	Afu3g11480 AspGDID:ASPL0000105546 COORDS:Chr3_A_fumigatus_Af293:3012552-3013542W, translated using codon table 1 (308 amino acids) Uncharacterized ORF; Putative enoyl-CoA hydratase	26.1223	31.17	1	7	7	7	308	32.9927	9.26123
Afu4g12750	Afu4g12750 AspGDID:ASPL0000106981 COORDS:Chr4_A_fumigatus_Af293:3344997-3342675C, translated using codon table 1 (750 amino acids) Uncharacterized ORF; Ortholog(s) have role in deadenylation-dependent decapping of nuclear-transcribed mRNA and cytosol, nucleus localization	25.4016	16.13	1	9	9	9	750	84.8371	6.99072
Afu7g03670	Afu7g03670 AspGDID:ASPL0000110062 COORDS:Chr7_A_fumigatus_Af293:783542-785758W, translated using codon table 1 (604 amino acids) Uncharacterized ORF; Ortholog of <i>A. nidulans FGSC A4</i> : AN8289, <i>A. niger CBS 513.88</i> : An13g00010, <i>Aspergillus wentii</i> : Aspwe1_0170297, <i>Aspergillus sydowii</i> : Aspsy1_1173898 and <i>Aspergillus terreus NIH2624</i> : ATET_02780	25.0696	16.89	1	5	5	5	604	65.6704	7.13721
Afu5g03340	Afu5g03340 AspGDID:ASPL0000107513 COORDS:Chr5_A_fumigatus_Af293:900468-901964W, translated using codon table 1 (498 amino acids) Uncharacterized ORF; Ortholog of <i>A. nidulans FGSC A4</i> : AN8202, <i>A. niger CBS 513.88</i> : An09g05655, <i>A. oryzae RIB40</i> : AO090102000539, <i>Aspergillus wentii</i> : Aspwe1_0115517 and <i>Aspergillus sydowii</i> : Aspsy1_0161584	24.0915	16.67	1	6	6	7	498	57.0145	5.19873
Afu4g03160	Afu4g03160 AspGDID:ASPL0000106134 COORDS:Chr4_A_fumigatus_Af293:886361-887395W, translated using codon table 1 (344 amino acids) Uncharacterized ORF; Ortholog(s) have U2-type spliceosomal complex, cytosol localization	22.9939	22.97	1	5	5	6	344	37.7829	5.8208
Afu3g10240	Afu3g10240 AspGDID:ASPL0000105422 COORDS:Chr3_A_fumigatus_Af293:2649693-2642482C, translated using codon table 1 (2327 amino acids) Uncharacterized ORF; Ortholog(s) have cytosol, nucleus localization	22.8601	4.81	1	9	9	9	2327	258.955	5.94775
Afu2g15840	Afu2g15840 AspGDID:ASPL0000104301 COORDS:Chr2_A_fumigatus_Af293:4185756-4183151C, translated using codon table 1 (804 amino acids) Uncharacterized ORF; Ortholog of <i>A. nidulans FGSC A4</i> : AN9067/tinC, AN2167/hetC, <i>A. fumigatus Af293</i> : Afu7g02570, <i>A. niger CBS 513.88</i> : An15g06140 and <i>A. oryzae RIB40</i> : AO090038000633, AO090012000230	21.2614	11.82	1	6	6	6	804	88.6335	6.81494
Afu6g12600	Afu6g12600 AspGDID:ASPL0000109603 COORDS:Chr6_A_fumigatus_Af293:3185640-3183146C, translated using codon table 1 (704 amino acids) Uncharacterized ORF; Ortholog of <i>A. nidulans FGSC A4</i> : AN3693, <i>A. niger CBS 513.88</i> : An06g01780, <i>A. oryzae RIB40</i> : AO090003000373, <i>Aspergillus wentii</i> : Aspwe1_0203403 and <i>Aspergillus sydowii</i> : Aspsy1_0892534	19.7334	13.78	1	6	6	6	704	76.2054	5.5542
Afu2g13040	grpE AspGDID:ASPL0000104018 COORDS:Chr2_A_fumigatus_Af293:3347479-3346582C, translated using codon table 1 (250 amino acids) Uncharacterized ORF; Mitochondrial co-chaperone; protein level decreases upon heat shock	19.0253	26.8	1	5	5	6	250	28.3728	8.25049
Afu6g06345	Afu6g06345 AspGDID:ASPL0000108995 COORDS:Chr6_A_fumigatus_Af293:1347575-1348344W, translated using codon table 1 (205 amino acids) Uncharacterized ORF; Ortholog(s) have 6,7-dimethyl-8-ribityllumazine synthase activity, role in riboflavin biosynthetic process and mitochondrial intermembrane space, nucleus localization	15.3602	42.44	1	4	4	4	205	21.5393	6.1001
Afu6g12820	mpkB AspGDID:ASPL0000109625 COORDS:Chr6_A_fumigatus_Af293:3233954-3232650C, translated using codon table 1 (353 amino acids) Uncharacterized ORF; Putative mitogen-activated protein kinase (MAPK)	14.8555	18.13	1	5	5	5	353	40.8268	6.90283
Afu7g04550	Afu7g04550 AspGDID:ASPL0000110148 COORDS:Chr7_A_fumigatus_Af293:1037177-1035943C, translated using codon table 1 (389 amino acids) Uncharacterized ORF; Has domain(s) with predicted ATP binding, protein kinase activity, protein tyrosine kinase activity, transferase activity, transferring phosphorus-containing groups activity and role in protein phosphorylation	14.8383	13.11	1	4	4	4	389	43.1947	7.78174
Afu6g02620	Afu6g02620 AspGDID:ASPL0000108717 COORDS:Chr6_A_fumigatus_Af293:503629-501127C, translated using codon table 1 (762 amino acids) Uncharacterized ORF; Has domain(s) with predicted 2-dehydropantoate 2-reductase activity, NADP binding, coenzyme binding, oxidoreductase activity, oxidoreductase activity, acting on the CH-OH group of donors, NAD or NADP as acceptor activity	14.5524	10.5	1	4	4	4	762	82.9429	7.45947
Afu4g08040	Afu4g08040 AspGDID:ASPL0000106518 COORDS:Chr4_A_fumigatus_Af293:2090716-2089786C, translated using codon table 1 (218 amino acids) Uncharacterized ORF; Ortholog(s) have GTP binding activity	14.3565	27.52	1	5	5	5	218	23.7153	8.54346
Afu3g10740	Afu3g10740 AspGDID:ASPL0000105472 COORDS:Chr3_A_fumigatus_Af293:2782828-2781858C, translated using codon table 1 (262 amino acids) Uncharacterized ORF; Putative RAB GTPase with a predicted role in regulation of endocytosis; transcript downregulated in response to amphotericin B	14.2312	24.81	1	4	4	4	262	27.5867	4.84326
Afu5g12250	Afu5g12250 AspGDID:ASPL0000108281 COORDS:Chr5_A_fumigatus_Af293:3179873-3182548W, translated using codon table 1 (731 amino acids) Uncharacterized ORF; Ortholog(s) have role in cellular response to DNA damage stimulus, interspecies interaction between organisms and cytosol, nucleus, polysome localization	13.7422	6.98	1	4	4	4	731	82.9925	6.22705
Afu1g09630	Afu1g09630 AspGDID:ASPL0000102029 COORDS:Chr1_A_fumigatus_Af293:2492509-2488889C, translated using codon table 1 (1056 amino acids) Uncharacterized ORF; Ortholog of <i>A. nidulans FGSC A4</i> : AN1325, <i>A. niger CBS 513.88</i> : An08g01230, <i>A. oryzae RIB40</i> : AO090012000905, <i>Aspergillus wentii</i> : Aspwe1_0036403 and <i>Aspergillus sydowii</i> : Aspsy1_0053047	13.1892	4.17	1	3	3	3	1056	114.406	9.53955
Afu5g08230	Afu5g08230 AspGDID:ASPL0000107895 COORDS:Chr5_A_fumigatus_Af293:2087574-2086099C, translated using codon table 1 (473 amino acids) Uncharacterized ORF; Has domain(s) with predicted zinc ion binding activity	13	15.86	1	4	4	4	473	51.7644	8.23584
Afu5g07800	Afu5g07800 AspGDID:ASPL0000107852 COORDS:Chr5_A_fumigatus_Af293:1954043-1956749W, translated using codon table 1 (439 amino acids) Uncharacterized ORF; Ortholog of <i>A. nidulans FGSC A4</i> : AN7749, <i>A. niger CBS 513.88</i> : An03g03800, <i>A. oryzae RIB40</i> : AO090701000914, <i>Aspergillus wentii</i> : Aspwe1_0101068 and <i>Aspergillus sydowii</i> : Aspsy1_0058767	12.9571	8.2	1	2	2	3	439	45.7156	10.2134
Afu1g06710	Afu1g06710 AspGDID:ASPL0000101839 COORDS:Chr1_A_fumigatus_Af293:1922660-1920607C, translated using codon table 1 (564 amino acids) Uncharacterized ORF; Ortholog(s) have chaperonin-containing T-complex, nucleus localization	12.8205	7.27	1	2	2	3	564	60.9935	6.34131
Afu2g11750	Afu2g11750 AspGDID:ASPL0000103889 COORDS:Chr2_A_fumigatus_Af293:3018382-3020166W, translated using codon table 1 (543 amino acids) Uncharacterized ORF; Ortholog(s) have mitochondrion localization	12.044	8.66	1	3	3	3	543	57.0836	9.40771
Afu2g13540	Afu2g13540 AspGDID:ASPL0000104069 COORDS:Chr2_A_fumigatus_Af293:3521810-3524345W, translated using codon table 1 (744 amino acids) Uncharacterized ORF; Ortholog(s) have nucleus localization	11.5338	5.65	1	3	3	3	744	81.8761	6.04932
Afu1g03010	Afu1g03010 AspGDID:ASPL0000101471 COORDS:Chr1_A_fumigatus_Af293:869019-866374C, translated using codon table 1 (881 amino acids) Uncharacterized ORF; Ortholog(s) have U2-type spliceosomal complex localization	9.88252	4.31	1	3	3	3	881	100.781	9.94971
Afu6g07980	Afu6g07980 AspGDID:ASPL0000109158 COORDS:Chr6_A_fumigatus_Af293:1850730-1849524C, translated using codon table 1 (323 amino acids) Uncharacterized ORF; Ortholog(s) have RNA polymerase II core binding, cyclin-dependent protein serine/threonine kinase activity, histone binding activity	9.65081	11.76	1	3	3	3	323	36.6309	7.59131
Afu4g06890	cyp51A AspGDID:ASPL0000106403 COORDS:Chr4_A_fumigatus_Af293:1785331-1783713C, translated using codon table 1 (515 amino acids) Verified ORF; 14-alpha sterol demethylase; commonly mutated in drug resistant isolates; putative ortholog of A. nidulans pdmA; transcript induced by exposure to fluconazole and voriconazole; SrbA-regulated during hypoxia	9.20663	7.38	1	3	3	3	515	58.0308	8.52881
Afu2g10270	tor AspGDID:ASPL0000103742 COORDS:Chr2_A_fumigatus_Af293:2631516-2624171C, translated using codon table 1 (2384 amino acids) Uncharacterized ORF; Tor kinase, involved in regulation cell wall biosynthesis and nutrient sensing	8.98308	2.06	1	3	3	3	2384	269.413	6.90283
Afu1g09840	tim44 AspGDID:ASPL0000102050 COORDS:Chr1_A_fumigatus_Af293:2554479-2552871C, translated using codon table 1 (515 amino acids) Uncharacterized ORF; Mitochondrial inner membrane translocase subunit	8.75386	10.29	1	4	4	4	515	57.7095	9.11475
Afu6g03590	mcsA AspGDID:ASPL0000108814 COORDS:Chr6_A_fumigatus_Af293:783347-784866W, translated using codon table 1 (465 amino acids) Verified ORF; Methylcitrate synthase; catalyses the condensation of propionyl-CoA and oxaloacetate to methylcitrate; conidia-enriched protein; mutants killed more readily by alveolar macrophages and show decreased virulence in mice	8.05629	9.46	1	3	3	3	465	51.3799	8.93896
Afu6g12740	Afu6g12740 AspGDID:ASPL0000109617 COORDS:Chr6_A_fumigatus_Af293:3219940-3220875W, translated using codon table 1 (245 amino acids) Uncharacterized ORF; Dienelactone hydrolase family protein	7.79545	17.96	1	3	3	3	245	26.9258	6.63916
Afu5g07890	Afu5g07890 AspGDID:ASPL0000107861 COORDS:Chr5_A_fumigatus_Af293:1979250-1978604C, translated using codon table 1 (149 amino acids) Uncharacterized ORF; Putative single-stranded DNA binding protein family member	6.15397	17.45	1	2	2	2	149	16.2432	9.68604
Afu7g05260	Afu7g05260 AspGDID:ASPL0000110219 COORDS:Chr7_A_fumigatus_Af293:1249230-1250373W, translated using codon table 1 (304 amino acids) Uncharacterized ORF; Has domain(s) with predicted nucleic acid binding, nucleotide binding activity	5.90987	11.51	1	2	2	2	304	34.3573	8.71924
Afu5g07370	Afu5g07370 AspGDID:ASPL0000107811 COORDS:Chr5_A_fumigatus_Af293:1844081-1842511C, translated using codon table 1 (500 amino acids) Uncharacterized ORF; Ortholog(s) have metal ion binding, poly(A)-specific ribonuclease activity	5.615	7.8	1	3	3	3	500	53.7507	7.07861
Afu1g02510	Afu1g02510 AspGDID:ASPL0000101421 COORDS:Chr1_A_fumigatus_Af293:729361-725524C, translated using codon table 1 (1018 amino acids) Uncharacterized ORF; Has domain(s) with predicted RNA binding activity	4.87253	3.73	1	2	2	2	1018	111.958	7.34229
AfuMt00120	AfuMt00120 AspGDID:ASPL0000366358 COORDS:mito_A_fumigatus_Af293:25862-26623W, translated using codon table 4 (253 amino acids) Uncharacterized ORF; Ortholog(s) have cytochrome-c oxidase activity, role in aerobic respiration, mitochondrial electron transport, cytochrome c to oxygen and mitochondrial respiratory chain complex IV localization	4.75823	10.67	1	2	2	2	253	28.9926	4.76709
Afu3g06640	Afu3g06640 AspGDID:ASPL0000105075 COORDS:Chr3_A_fumigatus_Af293:1644938-1644430C, translated using codon table 1 (82 amino acids) Uncharacterized ORF; Ortholog(s) have structural constituent of ribosome activity	2.69077	18.29	1	2	2	2	82	8.86157	9.26123
