# Supplementary material for: The Pheromone Module SteC-MkkB-MpkB-SteD-HamE Regulates Development, Stress Responses and Secondary Metabolism in Aspergillus fumigatus
Source: Front Microbiol. 2020 May 7;11:811. doi: 10.3389/fmicb.2020.00811 (PMC7223695; doi:10.3389/fmicb.2020.00811)
Supplement: Supplementary file 7 [file Table_6.XLSX]

## Sheet: Sheet1
Table S6: Aspergillus fumigatus MpkB-GFP interacting proteins (Vegetative growth-24 hours)
Accession	Description	Score	Coverage	# Proteins	# Unique Peptides	# Peptides	# PSMs	# AAs	MW [kDa]	calc. pI
Afu6g12820	mpkB AspGDID:ASPL0000109625 COORDS:Chr6_A_fumigatus_Af293:3233954-3232650C, translated using codon table 1 (353 amino acids) Uncharacterized ORF; Putative mitogen-activated protein kinase (MAPK)	230.623	77.34	1	20	20	43	353	40.8268	6.90283
Afu6g04600	Afu6g04600 AspGDID:ASPL0000108914 COORDS:Chr6_A_fumigatus_Af293:1069099-1067587C, translated using codon table 1 (477 amino acids) Uncharacterized ORF; Ortholog of <i>A. nidulans FGSC A4</i> : AN6560, <i>A. niger CBS 513.88</i> : An15g00728, <i>A. oryzae RIB40</i> : AO090701000086, <i>Aspergillus wentii</i> : Aspwe1_0324754 and <i>Aspergillus sydowii</i> : Aspsy1_0037161	175.749	53.25	1	19	19	35	477	50.7436	10.228
Afu5g06190	steA AspGDID:ASPL0000107696 COORDS:Chr5_A_fumigatus_Af293:1482488-1484873W, translated using codon table 1 (688 amino acids) Uncharacterized ORF; Putative transcription factor	51.2677	21.08	1	11	11	16	688	76.5834	6.63916
Afu3g09820	dvrA AspGDID:ASPL0000105380 COORDS:Chr3_A_fumigatus_Af293:2515556-2517655W, translated using codon table 1 (679 amino acids) Verified ORF; C2H2 zinc finger domain protein; putative ortholog of C. albicans Bcr1p; mutants are hypervirulent in neutropenic mice and in flies	44.6845	20.03	1	9	9	12	679	73.1647	9.48096
Afu1g12680	Afu1g12680 AspGDID:ASPL0000102336 COORDS:Chr1_A_fumigatus_Af293:3351052-3347476C, translated using codon table 1 (1072 amino acids) Uncharacterized ORF; Ortholog(s) have Rho GTPase activator activity	30.9307	8.3	1	6	6	8	1072	117.677	6.771
Afu5g02160	Afu5g02160 AspGDID:ASPL0000107396 COORDS:Chr5_A_fumigatus_Af293:552208-549993C, translated using codon table 1 (613 amino acids) Uncharacterized ORF; Ortholog(s) have nucleolus localization	27.3726	13.38	1	4	4	5	613	65.768	7.34229
Afu1g00460	Afu1g00460 AspGDID:ASPL0000101218 COORDS:Chr1_A_fumigatus_Af293:146969-145247C, translated using codon table 1 (507 amino acids) Uncharacterized ORF; Ortholog(s) have intracellular localization	24.6722	19.92	1	7	7	7	507	55.8111	6.15088
Afu1g03010	Afu1g03010 AspGDID:ASPL0000101471 COORDS:Chr1_A_fumigatus_Af293:869019-866374C, translated using codon table 1 (881 amino acids) Uncharacterized ORF; Ortholog(s) have U2-type spliceosomal complex localization	23.7501	9.65	1	6	6	7	881	100.781	9.94971
Afu2g16020	Afu2g16020 AspGDID:ASPL0000104319 COORDS:Chr2_A_fumigatus_Af293:4237810-4239808W, translated using codon table 1 (566 amino acids) Uncharacterized ORF; Putative heat shock protein; transcript induced during conidial germination	21.9083	15.55	1	4	4	5	566	61.6862	6.87354
Afu2g03830	aspf4 AspGDID:ASPL0000103209 COORDS:Chr2_A_fumigatus_Af293:1016683-1017651W, translated using codon table 1 (322 amino acids) Verified ORF; Allergen Asp f 4; higher expression in biofilm vs planktonic cells; transcript induced by growth on hydrogen peroxide	20.8876	27.64	1	5	5	5	322	34.0634	5.35107
Afu2g13860	Afu2g13860 AspGDID:ASPL0000104101 COORDS:Chr2_A_fumigatus_Af293:3619597-3620049W, translated using codon table 1 (142 amino acids) Uncharacterized ORF; Histone H4	19.7364	23.24	1	4	4	6	142	15.7624	10.2134
Afu3g10240	Afu3g10240 AspGDID:ASPL0000105422 COORDS:Chr3_A_fumigatus_Af293:2649693-2642482C, translated using codon table 1 (2327 amino acids) Uncharacterized ORF; Ortholog(s) have cytosol, nucleus localization	18.614	3.91	1	7	7	7	2327	258.955	5.94775
Afu4g03160	Afu4g03160 AspGDID:ASPL0000106134 COORDS:Chr4_A_fumigatus_Af293:886361-887395W, translated using codon table 1 (344 amino acids) Uncharacterized ORF; Ortholog(s) have U2-type spliceosomal complex, cytosol localization	16.9539	24.13	1	5	5	5	344	37.7829	5.8208
Afu6g12600	Afu6g12600 AspGDID:ASPL0000109603 COORDS:Chr6_A_fumigatus_Af293:3185640-3183146C, translated using codon table 1 (704 amino acids) Uncharacterized ORF; Ortholog of <i>A. nidulans FGSC A4</i> : AN3693, <i>A. niger CBS 513.88</i> : An06g01780, <i>A. oryzae RIB40</i> : AO090003000373, <i>Aspergillus wentii</i> : Aspwe1_0203403 and <i>Aspergillus sydowii</i> : Aspsy1_0892534	16.4616	12.93	1	6	6	6	704	76.2054	5.5542
Afu7g03670	Afu7g03670 AspGDID:ASPL0000110062 COORDS:Chr7_A_fumigatus_Af293:783542-785758W, translated using codon table 1 (604 amino acids) Uncharacterized ORF; Ortholog of <i>A. nidulans FGSC A4</i> : AN8289, <i>A. niger CBS 513.88</i> : An13g00010, <i>Aspergillus wentii</i> : Aspwe1_0170297, <i>Aspergillus sydowii</i> : Aspsy1_1173898 and <i>Aspergillus terreus NIH2624</i> : ATET_02780	16.1736	11.26	1	2	2	3	604	65.6704	7.13721
Afu5g12250	Afu5g12250 AspGDID:ASPL0000108281 COORDS:Chr5_A_fumigatus_Af293:3179873-3182548W, translated using codon table 1 (731 amino acids) Uncharacterized ORF; Ortholog(s) have role in cellular response to DNA damage stimulus, interspecies interaction between organisms and cytosol, nucleus, polysome localization	16.1476	9.99	1	5	5	5	731	82.9925	6.22705
Afu2g03810	hosA AspGDID:ASPL0000103207 COORDS:Chr2_A_fumigatus_Af293:1012691-1011228C, translated using codon table 1 (487 amino acids) Uncharacterized ORF; Putative histone deacetylase	15.8885	14.78	1	3	3	3	487	54.3098	6.13818
Afu1g07090	Afu1g07090 AspGDID:ASPL0000101875 COORDS:Chr1_A_fumigatus_Af293:2015732-2011032C, translated using codon table 1 (1526 amino acids) Uncharacterized ORF; Ortholog of <i>A. nidulans FGSC A4</i> : AN5154, <i>A. niger CBS 513.88</i> : An07g09710, <i>A. oryzae RIB40</i> : AO090012000961, <i>Aspergillus wentii</i> : Aspwe1_0155743 and <i>Aspergillus sydowii</i> : Aspsy1_0134266	14.7802	4.65	1	4	4	4	1526	164.391	6.65381
Afu1g06170	Afu1g06170 AspGDID:ASPL0000101785 COORDS:Chr1_A_fumigatus_Af293:1784284-1782664C, translated using codon table 1 (464 amino acids) Uncharacterized ORF; Ortholog(s) have role in positive regulation of RNA polymerase II transcriptional preinitiation complex assembly, proteasome regulatory particle assembly, ubiquitin-dependent protein catabolic process	14.6076	13.15	1	4	4	4	464	51.6705	4.97021
Afu4g11830	Afu4g11830 AspGDID:ASPL0000106891 COORDS:Chr4_A_fumigatus_Af293:3122796-3124999W, translated using codon table 1 (713 amino acids) Uncharacterized ORF; Ortholog(s) have U2-type spliceosomal complex localization	14.2651	9.12	1	4	4	4	713	83.3627	7.12256
Afu3g05900	ste7 AspGDID:ASPL0000105003 COORDS:Chr3_A_fumigatus_Af293:1444958-1446786W, translated using codon table 1 (536 amino acids) Uncharacterized ORF; MAP kinase kinase (MAPKK)	14.1217	14.74	1	5	5	5	536	58.482	9.0708
Afu1g02150	Afu1g02150 AspGDID:ASPL0000101385 COORDS:Chr1_A_fumigatus_Af293:639645-637892C, translated using codon table 1 (519 amino acids) Uncharacterized ORF; Ortholog(s) have glycerol-3-phosphate dehydrogenase [NAD+] activity and role in NADH oxidation, cell-abiotic substrate adhesion, glycerol biosynthetic process, intracellular accumulation of glycerol	13.9767	12.14	1	4	4	4	519	56.4221	8.19189
Afu8g05440	atp4 AspGDID:ASPL0000110874 COORDS:Chr8_A_fumigatus_Af293:1265282-1266290W, translated using codon table 1 (274 amino acids) Uncharacterized ORF; Mitochondrial ATPase subunit; hypoxia repressed protein	13.9714	25.18	1	4	4	4	274	29.7087	9.34912
Afu6g13140	Afu6g13140 AspGDID:ASPL0000109656 COORDS:Chr6_A_fumigatus_Af293:3322359-3321489C, translated using codon table 1 (232 amino acids) Uncharacterized ORF; Ortholog(s) have 3,4-dihydroxy-2-butanone-4-phosphate synthase activity, role in aerobic respiration, riboflavin biosynthetic process and cytosol, mitochondrial intermembrane space, nucleus localization	13.7652	20.26	1	3	3	3	232	25.2938	5.03369
Afu2g15840	Afu2g15840 AspGDID:ASPL0000104301 COORDS:Chr2_A_fumigatus_Af293:4185756-4183151C, translated using codon table 1 (804 amino acids) Uncharacterized ORF; Ortholog of <i>A. nidulans FGSC A4</i> : AN9067/tinC, AN2167/hetC, <i>A. fumigatus Af293</i> : Afu7g02570, <i>A. niger CBS 513.88</i> : An15g06140 and <i>A. oryzae RIB40</i> : AO090038000633, AO090012000230	13.7624	7.71	1	3	3	3	804	88.6335	6.81494
Afu5g07890	Afu5g07890 AspGDID:ASPL0000107861 COORDS:Chr5_A_fumigatus_Af293:1979250-1978604C, translated using codon table 1 (149 amino acids) Uncharacterized ORF; Putative single-stranded DNA binding protein family member	13.5353	34.9	1	5	5	5	149	16.2432	9.68604
Afu4g09140	car2 AspGDID:ASPL0000106629 COORDS:Chr4_A_fumigatus_Af293:2388283-2389697W, translated using codon table 1 (450 amino acids) Uncharacterized ORF; L-ornithine aminotransferase; induced by growth on BSA as a sole nitrogen source; SrbA-regulated during hypoxia	13.2176	14.22	1	4	4	4	450	49.0863	6.53662
Afu8g02620	Afu8g02620 AspGDID:ASPL0000110698 COORDS:Chr8_A_fumigatus_Af293:695141-693100C, translated using codon table 1 (607 amino acids) Uncharacterized ORF; Ortholog of <i>A. nidulans FGSC A4</i> : AN10344, <i>A. niger CBS 513.88</i> : An03g06730, <i>A. oryzae RIB40</i> : AO090010000752, <i>Neosartorya fischeri NRRL 181</i> : NFIA_096330 and <i>Aspergillus wentii</i> : Aspwe1_0033226	12.6487	7.25	1	3	3	3	607	68.8607	4.65283
Afu1g06710	Afu1g06710 AspGDID:ASPL0000101839 COORDS:Chr1_A_fumigatus_Af293:1922660-1920607C, translated using codon table 1 (564 amino acids) Uncharacterized ORF; Ortholog(s) have chaperonin-containing T-complex, nucleus localization	12.2876	9.93	1	3	3	3	564	60.9935	6.34131
Afu6g11890	Afu6g11890 AspGDID:ASPL0000109535 COORDS:Chr6_A_fumigatus_Af293:2972392-2969433C, translated using codon table 1 (930 amino acids) Uncharacterized ORF; Putative dynamin GTPase	12.2067	6.67	1	4	4	4	930	104.337	6.82959
Afu1g10970	Afu1g10970 AspGDID:ASPL0000102160 COORDS:Chr1_A_fumigatus_Af293:2865856-2868959W, translated using codon table 1 (955 amino acids) Uncharacterized ORF; Ortholog(s) have cytosol, plasma membrane localization	11.8765	4.92	1	4	4	4	955	106.49	5.70654
Afu6g12770	Afu6g12770 AspGDID:ASPL0000109620 COORDS:Chr6_A_fumigatus_Af293:3226794-3225505C, translated using codon table 1 (381 amino acids) Uncharacterized ORF; Ortholog of <i>A. nidulans FGSC A4</i> : AN3716, <i>A. niger CBS 513.88</i> : An08g10710, <i>A. oryzae RIB40</i> : AO090003000397, <i>Aspergillus wentii</i> : Aspwe1_0102826 and <i>Aspergillus sydowii</i> : Aspsy1_0032599	11.849	12.6	1	4	4	4	381	43.4463	5.40186
Afu6g09810	Afu6g09810 AspGDID:ASPL0000109337 COORDS:Chr6_A_fumigatus_Af293:2412063-2410823C, translated using codon table 1 (344 amino acids) Uncharacterized ORF; Ortholog of <i>A. nidulans FGSC A4</i> : AN7525, <i>A. niger CBS 513.88</i> : An11g07690, <i>A. oryzae RIB40</i> : AO090001000614, <i>Aspergillus wentii</i> : Aspwe1_0045811 and <i>Aspergillus sydowii</i> : Aspsy1_0045889	11.7079	21.51	1	4	4	4	344	37.3856	8.89502
Afu5g06820	Afu5g06820 AspGDID:ASPL0000107758 COORDS:Chr5_A_fumigatus_Af293:1678782-1677790C, translated using codon table 1 (330 amino acids) Uncharacterized ORF; Ortholog of <i>A. niger CBS 513.88</i> : An03g00400, <i>A. oryzae RIB40</i> : AO090701000306, <i>Neosartorya fischeri NRRL 181</i> : NFIA_036290 and <i>Aspergillus niger ATCC 1015</i> : 45807-mRNA	11.6452	17.58	1	2	3	4	330	37.6813	7.04932
Afu6g03590	mcsA AspGDID:ASPL0000108814 COORDS:Chr6_A_fumigatus_Af293:783347-784866W, translated using codon table 1 (465 amino acids) Verified ORF; Methylcitrate synthase; catalyses the condensation of propionyl-CoA and oxaloacetate to methylcitrate; conidia-enriched protein; mutants killed more readily by alveolar macrophages and show decreased virulence in mice	11.5237	11.61	1	4	4	4	465	51.3799	8.93896
Afu6g12740	Afu6g12740 AspGDID:ASPL0000109617 COORDS:Chr6_A_fumigatus_Af293:3219940-3220875W, translated using codon table 1 (245 amino acids) Uncharacterized ORF; Dienelactone hydrolase family protein	11.0125	15.51	1	3	3	3	245	26.9258	6.63916
Afu3g09030	Afu3g09030 AspGDID:ASPL0000105302 COORDS:Chr3_A_fumigatus_Af293:2303487-2302210C, translated using codon table 1 (310 amino acids) Uncharacterized ORF; Ortholog(s) have role in aerobic respiration, penicillin biosynthetic process and mitochondrial matrix localization	10.9941	15.16	1	3	3	3	310	34.8563	4.65283
Afu1g12920	glpV AspGDID:ASPL0000102360 COORDS:Chr1_A_fumigatus_Af293:3420644-3417594C, translated using codon table 1 (879 amino acids) Uncharacterized ORF; Putative glycogen phosphorylase; transcript up-regulated in conidia exposed to neutrophils	10.7768	4.55	1	2	2	2	879	100.25	6.03662
Afu5g10640	Afu5g10640 AspGDID:ASPL0000108128 COORDS:Chr5_A_fumigatus_Af293:2721762-2723271W, translated using codon table 1 (391 amino acids) Uncharacterized ORF; Ortholog(s) have tyrosine-tRNA ligase activity, role in tyrosyl-tRNA aminoacylation and cytosol, nucleus localization	10.7201	14.07	1	4	4	4	391	43.5878	6.58057
Afu4g08040	Afu4g08040 AspGDID:ASPL0000106518 COORDS:Chr4_A_fumigatus_Af293:2090716-2089786C, translated using codon table 1 (218 amino acids) Uncharacterized ORF; Ortholog(s) have GTP binding activity	10.6371	24.31	1	3	3	3	218	23.7153	8.54346
Afu1g09630	Afu1g09630 AspGDID:ASPL0000102029 COORDS:Chr1_A_fumigatus_Af293:2492509-2488889C, translated using codon table 1 (1056 amino acids) Uncharacterized ORF; Ortholog of <i>A. nidulans FGSC A4</i> : AN1325, <i>A. niger CBS 513.88</i> : An08g01230, <i>A. oryzae RIB40</i> : AO090012000905, <i>Aspergillus wentii</i> : Aspwe1_0036403 and <i>Aspergillus sydowii</i> : Aspsy1_0053047	10.0743	3.6	1	2	2	2	1056	114.406	9.53955
Afu1g12590	Afu1g12590 AspGDID:ASPL0000102327 COORDS:Chr1_A_fumigatus_Af293:3325919-3324668C, translated using codon table 1 (398 amino acids) Uncharacterized ORF; La protein homolog	10.0012	10.55	1	3	3	3	398	44.5277	7.89893
Afu5g02150	pre6 AspGDID:ASPL0000107395 COORDS:Chr5_A_fumigatus_Af293:548545-547635C, translated using codon table 1 (251 amino acids) Uncharacterized ORF; Putative proteasome component; reacts with rabbit immunosera exposed to A. fumigatus conidia; transcript induced by exposure to human airway epithelial cells	9.98187	16.73	1	2	2	2	251	27.4313	7.94287
Afu4g07650	cyp6 AspGDID:ASPL0000106480 COORDS:Chr4_A_fumigatus_Af293:1987776-1988776W, translated using codon table 1 (209 amino acids) Uncharacterized ORF; Putative peptidyl-prolyl cis-trans isomerase	9.83564	19.62	1	3	3	3	209	22.9459	8.27979
Afu1g04550	Afu1g04550 AspGDID:ASPL0000101623 COORDS:Chr1_A_fumigatus_Af293:1287140-1288616W, translated using codon table 1 (309 amino acids) Uncharacterized ORF; Ortholog of <i>A. nidulans FGSC A4</i> : AN10103, <i>A. niger CBS 513.88</i> : An01g03560, <i>Neosartorya fischeri NRRL 181</i> : NFIA_020200, <i>Aspergillus wentii</i> : Aspwe1_0037471 and <i>Aspergillus versicolor</i> : Aspve1_0118735	9.7522	11	1	2	2	2	309	34.0082	8.51416
Afu2g13040	grpE AspGDID:ASPL0000104018 COORDS:Chr2_A_fumigatus_Af293:3347479-3346582C, translated using codon table 1 (250 amino acids) Uncharacterized ORF; Mitochondrial co-chaperone; protein level decreases upon heat shock	9.74534	18.8	1	3	3	3	250	28.3728	8.25049
Afu1g09840	tim44 AspGDID:ASPL0000102050 COORDS:Chr1_A_fumigatus_Af293:2554479-2552871C, translated using codon table 1 (515 amino acids) Uncharacterized ORF; Mitochondrial inner membrane translocase subunit	9.63886	8.35	1	3	3	3	515	57.7095	9.11475
Afu4g06890	cyp51A AspGDID:ASPL0000106403 COORDS:Chr4_A_fumigatus_Af293:1785331-1783713C, translated using codon table 1 (515 amino acids) Verified ORF; 14-alpha sterol demethylase; commonly mutated in drug resistant isolates; putative ortholog of A. nidulans pdmA; transcript induced by exposure to fluconazole and voriconazole; SrbA-regulated during hypoxia	9.29828	8.54	1	4	4	4	515	58.0308	8.52881
Afu5g05460	Afu5g05460 AspGDID:ASPL0000107625 COORDS:Chr5_A_fumigatus_Af293:1268981-1268053C, translated using codon table 1 (242 amino acids) Uncharacterized ORF; Cytosine deaminase-uracil phosphoribosyltransferase fusion protein; transcript induced by exposure to human airway epithelial cells	9.28388	14.05	1	2	2	2	242	26.9281	7.76709
Afu5g02910	Afu5g02910 AspGDID:ASPL0000107470 COORDS:Chr5_A_fumigatus_Af293:772100-770907C, translated using codon table 1 (354 amino acids) Uncharacterized ORF; NAP family protein	9.16993	12.15	1	3	3	3	354	41.0408	4.50049
Afu6g03520	Afu6g03520 AspGDID:ASPL0000108807 COORDS:Chr6_A_fumigatus_Af293:765294-764308C, translated using codon table 1 (278 amino acids) Uncharacterized ORF; Putative short-chain dehydrogenase/reductase family protein; predicted gene pair with AFUA_4G03680	9.15923	19.06	1	4	4	4	278	29.6302	6.94678
Afu3g09910	Afu3g09910 AspGDID:ASPL0000105389 COORDS:Chr3_A_fumigatus_Af293:2542185-2543380W, translated using codon table 1 (331 amino acids) Uncharacterized ORF; Ortholog(s) have phosphatidylcholine transporter activity and role in Golgi to plasma membrane transport, ascospore formation, mitotic cytokinesis, phospholipid transport, regulation of filamentous growth	9.10372	16.31	1	4	4	4	331	37.3006	5.51611
Afu6g03810	Afu6g03810 AspGDID:ASPL0000108836 COORDS:Chr6_A_fumigatus_Af293:840093-839212C, translated using codon table 1 (255 amino acids) Uncharacterized ORF; Putative mitochondrial ATP synthase D chain; hypoxia induced protein	8.99014	15.69	1	2	2	2	255	28.6782	9.0415
Afu7g05870	pre8 AspGDID:ASPL0000110279 COORDS:Chr7_A_fumigatus_Af293:1438165-1439254W, translated using codon table 1 (282 amino acids) Uncharacterized ORF; Putative proteasome subunit; immunoreactive protein; reacts with rabbit immunosera exposed to A. fumigatus conidia	8.79317	14.18	1	2	2	2	282	30.4438	5.5542
Afu8g05480	Afu8g05480 AspGDID:ASPL0000110878 COORDS:Chr8_A_fumigatus_Af293:1281139-1279477C, translated using codon table 1 (452 amino acids) Uncharacterized ORF; Ortholog(s) have role in nuclear-transcribed mRNA catabolic process, meiosis-specific transcripts, poly(A)+ mRNA export from nucleus and nucleus localization	8.46658	11.73	1	3	3	3	452	49.9665	8.47021
Afu3g10000	pkaR AspGDID:ASPL0000105398 COORDS:Chr3_A_fumigatus_Af293:2570161-2571402W, translated using codon table 1 (413 amino acids) Verified ORF; cAMP-dependent protein kinase regulatory subunit; induced by endothelial cells and human airway epithelial cells; mutants sensitive to storage in water and contain more nuclei than wild-type; up-regulated in neutrophil-exposed conidia	8.4085	7.26	1	2	2	2	413	44.5042	5.18604
Afu5g04160	Afu5g04160 AspGDID:ASPL0000107595 COORDS:Chr5_A_fumigatus_Af293:1105009-1106759W, translated using codon table 1 (537 amino acids) Uncharacterized ORF; NTF2 and RRM domain protein	8.40429	9.5	1	3	3	3	537	56.9011	5.18604
Afu2g13590	Afu2g13590 AspGDID:ASPL0000104074 COORDS:Chr2_A_fumigatus_Af293:3535026-3535330W, translated using codon table 1 (81 amino acids) Uncharacterized ORF; Transcript up-regulated in conidia exposed to neutrophils	8.3359	38.27	1	2	2	2	81	9.33379	6.78564
Afu1g09550	Afu1g09550 AspGDID:ASPL0000102021 COORDS:Chr1_A_fumigatus_Af293:2468785-2469303W, translated using codon table 1 (143 amino acids) Uncharacterized ORF; Ortholog(s) have role in dynein-driven meiotic oscillatory nuclear movement, karyogamy involved in conjugation with cellular fusion, reciprocal meiotic recombination	8.09849	22.38	1	2	2	2	143	15.3157	5.45264
Afu3g12560	Afu3g12560 AspGDID:ASPL0000105652 COORDS:Chr3_A_fumigatus_Af293:3334574-3332914C, translated using codon table 1 (428 amino acids) Uncharacterized ORF; Putative allantoicase; induced by gliotoxin exposure	8.03817	13.08	1	3	3	4	428	46.2443	6.48096
Afu7g01480	Afu7g01480 AspGDID:ASPL0000109943 COORDS:Chr7_A_fumigatus_Af293:382905-383774W, translated using codon table 1 (249 amino acids) Uncharacterized ORF; Ortholog(s) have translation initiation factor activity, role in translational initiation and cytosol, nucleus localization	8.02294	8.84	1	2	2	2	249	27.973	5.99854
Afu3g03280	Afu3g03280 AspGDID:ASPL0000104846 COORDS:Chr3_A_fumigatus_Af293:876157-877704W, translated using codon table 1 (515 amino acids) Uncharacterized ORF; Putative FAD binding monooxygenase; calcium downregulated	8.0024	6.6	1	3	3	3	515	57.3464	7.18115
Afu5g05500	Afu5g05500 AspGDID:ASPL0000107629 COORDS:Chr5_A_fumigatus_Af293:1277444-1278887W, translated using codon table 1 (424 amino acids) Uncharacterized ORF; Ortholog(s) have phosphoglycerate dehydrogenase activity, role in serine family amino acid biosynthetic process and cytosol localization	7.9897	6.6	1	2	2	2	424	45.8868	7.00537
Afu3g10740	Afu3g10740 AspGDID:ASPL0000105472 COORDS:Chr3_A_fumigatus_Af293:2782828-2781858C, translated using codon table 1 (262 amino acids) Uncharacterized ORF; Putative RAB GTPase with a predicted role in regulation of endocytosis; transcript downregulated in response to amphotericin B	7.956	15.27	1	3	3	3	262	27.5867	4.84326
Afu2g09490	Afu2g09490 AspGDID:ASPL0000103667 COORDS:Chr2_A_fumigatus_Af293:2422679-2427552W, translated using codon table 1 (1525 amino acids) Uncharacterized ORF; Eukaryotic translation initiation factor subunit eIF-4F	7.89225	2.75	1	3	3	3	1525	163.883	9.36377
Afu7g06780	Afu7g06780 AspGDID:ASPL0000110368 COORDS:Chr7_A_fumigatus_Af293:1648499-1649833W, translated using codon table 1 (374 amino acids) Uncharacterized ORF; Has domain(s) with predicted oxidoreductase activity and role in oxidation-reduction process	7.75898	7.22	1	2	2	2	374	41.4641	7.43018
Afu3g10630	Afu3g10630 AspGDID:ASPL0000105461 COORDS:Chr3_A_fumigatus_Af293:2747083-2747630W, translated using codon table 1 (123 amino acids) Uncharacterized ORF; Ortholog(s) have mitochondrion localization	7.70852	33.33	1	2	2	3	123	13.5657	4.88135
Afu6g07540	Afu6g07540 AspGDID:ASPL0000109114 COORDS:Chr6_A_fumigatus_Af293:1715811-1713540C, translated using codon table 1 (548 amino acids) Uncharacterized ORF; Ortholog(s) have chaperonin-containing T-complex localization	7.59272	4.56	1	2	2	2	548	59.8493	5.51611
Afu3g11300	prs2 AspGDID:ASPL0000105528 COORDS:Chr3_A_fumigatus_Af293:2959483-2958408C, translated using codon table 1 (254 amino acids) Uncharacterized ORF; Putative proteasome component	7.22908	9.84	1	2	2	2	254	27.9201	6.37939
Afu1g09930	gcy1 AspGDID:ASPL0000102059 COORDS:Chr1_A_fumigatus_Af293:2570399-2571627W, translated using codon table 1 (349 amino acids) Uncharacterized ORF; Putative glycerol dehydrogenase; protein level decreases upon heat shock; transcript up-regulated in conidia exposed to neutrophils	7.14842	8.02	1	2	2	2	349	39.1061	8.83643
Afu4g04410	Afu4g04410 AspGDID:ASPL0000106258 COORDS:Chr4_A_fumigatus_Af293:1247460-1248557W, translated using codon table 1 (319 amino acids) Uncharacterized ORF; Immunoreactive protein; has predicted 3-hydroxyacyl-CoA dehydrogenase activity, coenzyme binding, nucleotide binding activity and a putative role in fatty acid metabolism	7.10184	10.97	1	3	3	3	319	33.6826	7.37158
Afu5g03520	Afu5g03520 AspGDID:ASPL0000107530 COORDS:Chr5_A_fumigatus_Af293:949870-951084W, translated using codon table 1 (323 amino acids) Verified ORF; Immunoreactive secreted protein	7.09912	8.36	1	2	2	2	323	35.4962	6.46826
Afu4g06790	Afu4g06790 AspGDID:ASPL0000106393 COORDS:Chr4_A_fumigatus_Af293:1755480-1756006W, translated using codon table 1 (93 amino acids) Uncharacterized ORF; Ubiquinol-cytochrome c reductase complex 14 kDa protein with a predicted role in oxidative phosphorylation; induced by exposure to artemisinin	7.06261	43.01	1	2	2	2	93	11.0149	6.31592
Afu1g11180	hsp78 AspGDID:ASPL0000102181 COORDS:Chr1_A_fumigatus_Af293:2946736-2944343C, translated using codon table 1 (797 amino acids) Uncharacterized ORF; Heat shock protein/chaperonin; transcript downregulated in response to voriconazole	6.96829	2.76	1	2	2	2	797	88.3298	7.02002
AfuMt00120	AfuMt00120 AspGDID:ASPL0000366358 COORDS:mito_A_fumigatus_Af293:25862-26623W, translated using codon table 4 (253 amino acids) Uncharacterized ORF; Ortholog(s) have cytochrome-c oxidase activity, role in aerobic respiration, mitochondrial electron transport, cytochrome c to oxygen and mitochondrial respiratory chain complex IV localization	6.96349	10.67	1	2	2	2	253	28.9926	4.76709
Afu8g04810	Afu8g04810 AspGDID:ASPL0000110815 COORDS:Chr8_A_fumigatus_Af293:1104248-1103015C, translated using codon table 1 (336 amino acids) Uncharacterized ORF; Ortholog(s) have role in circadian regulation of gene expression, conidium formation, establishment or maintenance of bipolar cell polarity regulating cell shape and protein phosphorylation, <a href="#GOsection">more</a>	6.95204	8.04	1	2	2	2	336	39.5131	7.31299
Afu8g05330	Afu8g05330 AspGDID:ASPL0000110863 COORDS:Chr8_A_fumigatus_Af293:1242642-1243783W, translated using codon table 1 (298 amino acids) Uncharacterized ORF; Putative methylenetetrahydrofolate dehydrogenase	6.94272	8.39	1	3	3	3	298	33.0434	6.53662
Afu1g15960	Afu1g15960 AspGDID:ASPL0000102659 COORDS:Chr1_A_fumigatus_Af293:4331468-4333260W, translated using codon table 1 (554 amino acids) Uncharacterized ORF; Ortholog(s) have flavin adenine dinucleotide binding, glutathione transferase activity, glutathione-disulfide reductase activity	6.93994	5.05	1	2	2	2	554	60.0714	8.70459
Afu2g04230	fahA AspGDID:ASPL0000103249 COORDS:Chr2_A_fumigatus_Af293:1174675-1175970W, translated using codon table 1 (431 amino acids) Uncharacterized ORF; Putative fumarylacetoacetate hydrolase:induced by L-tyrosine; immunoreactive protein; repressed by gliotoxin exposure	6.9295	7.66	1	2	2	2	431	46.7881	6.39209
Afu1g06240	Afu1g06240 AspGDID:ASPL0000101792 COORDS:Chr1_A_fumigatus_Af293:1798799-1797872C, translated using codon table 1 (233 amino acids) Uncharacterized ORF; Ortholog(s) have riboflavin synthase activity, role in riboflavin biosynthetic process and cytosol, nucleus localization	6.91779	9.87	1	2	2	2	233	25.235	5.32568
Afu5g01950	Afu5g01950 AspGDID:ASPL0000107375 COORDS:Chr5_A_fumigatus_Af293:500329-499510C, translated using codon table 1 (138 amino acids) Uncharacterized ORF; Ortholog(s) have chromatin binding activity	6.89012	18.84	1	2	3	3	138	14.7813	10.3745
Afu3g13830	Afu3g13830 AspGDID:ASPL0000105776 COORDS:Chr3_A_fumigatus_Af293:3651475-3654802W, translated using codon table 1 (1064 amino acids) Uncharacterized ORF; Ortholog(s) have role in ascospore wall assembly and ascospore wall, cytosol, nucleus localization	6.85904	4.7	1	2	2	2	1064	121.888	7.6499
Afu6g04010	Afu6g04010 AspGDID:ASPL0000108856 COORDS:Chr6_A_fumigatus_Af293:901498-904822W, translated using codon table 1 (962 amino acids) Uncharacterized ORF; Ortholog(s) have importin-alpha export receptor activity, role in cell division, protein export from nucleus and nuclear membrane localization	6.75291	4.47	1	2	2	2	962	108.421	5.37646
Afu1g16190	aspf9 AspGDID:ASPL0000102682 COORDS:Chr1_A_fumigatus_Af293:4404557-4405859W, translated using codon table 1 (395 amino acids) Verified ORF; Cell wall glucanase; allergen Asp f 9; predicted GPI-anchor; binds specifically to IgE antibodies in the sera of allergic bronchopulmonary aspergillosis (ABPA) patients; transcript repressed by H2O2; induced by exposure to artemisinin	6.64426	7.85	1	2	2	2	395	40.2592	4.77979
Afu1g10810	Afu1g10810 AspGDID:ASPL0000102144 COORDS:Chr1_A_fumigatus_Af293:2821017-2822416W, translated using codon table 1 (391 amino acids) Uncharacterized ORF; Ortholog(s) have role in calcium ion transport into cytosol and cytosol, plasma membrane localization	6.40771	7.16	1	2	2	2	391	44.1257	6.96143
Afu2g04940	Afu2g04940 AspGDID:ASPL0000103319 COORDS:Chr2_A_fumigatus_Af293:1358892-1357362C, translated using codon table 1 (470 amino acids) Uncharacterized ORF; Ortholog(s) have mRNA binding activity, role in telomere maintenance via telomere shortening and cytoplasm, nucleus localization	6.39994	9.15	1	3	3	3	470	49.135	7.72314
Afu3g10360	Afu3g10360 AspGDID:ASPL0000105434 COORDS:Chr3_A_fumigatus_Af293:2688254-2685337C, translated using codon table 1 (878 amino acids) Uncharacterized ORF; Ortholog(s) have protein transporter activity and role in ascospore formation, intracellular protein transport, protein retention in Golgi apparatus, retrograde transport, endosome to Golgi	6.27376	2.73	1	2	2	2	878	99.6631	5.96045
Afu1g03300	Afu1g03300 AspGDID:ASPL0000101500 COORDS:Chr1_A_fumigatus_Af293:955980-958095W, translated using codon table 1 (594 amino acids) Uncharacterized ORF; Ortholog of <i>A. nidulans FGSC A4</i> : AN6389, <i>A. fumigatus Af293</i> : Afu6g10800, <i>A. niger CBS 513.88</i> : An11g00440, <i>A. oryzae RIB40</i> : AO090023000186 and <i>Aspergillus wentii</i> : Aspwe1_0039443	6.27326	7.41	1	2	2	2	594	66.2784	6.53662
Afu5g08310	Afu5g08310 AspGDID:ASPL0000107903 COORDS:Chr5_A_fumigatus_Af293:2110783-2111831W, translated using codon table 1 (334 amino acids) Uncharacterized ORF; Has domain(s) with predicted nucleic acid binding, nucleotide binding activity	6.25136	6.89	1	2	2	2	334	36.4593	6.82959
Afu5g07370	Afu5g07370 AspGDID:ASPL0000107811 COORDS:Chr5_A_fumigatus_Af293:1844081-1842511C, translated using codon table 1 (500 amino acids) Uncharacterized ORF; Ortholog(s) have metal ion binding, poly(A)-specific ribonuclease activity	6.16198	4.6	1	2	2	2	500	53.7507	7.07861
Afu4g12750	Afu4g12750 AspGDID:ASPL0000106981 COORDS:Chr4_A_fumigatus_Af293:3344997-3342675C, translated using codon table 1 (750 amino acids) Uncharacterized ORF; Ortholog(s) have role in deadenylation-dependent decapping of nuclear-transcribed mRNA and cytosol, nucleus localization	6.157	4.4	1	2	2	2	750	84.8371	6.99072
Afu8g05610	btgE AspGDID:ASPL0000110890 COORDS:Chr8_A_fumigatus_Af293:1318148-1320231W, translated using codon table 1 (616 amino acids) Uncharacterized ORF; Putative cell wall glucanase	6.11105	7.63	1	2	2	2	616	63.6405	5.64307
Afu1g15000	Afu1g15000 AspGDID:ASPL0000102567 COORDS:Chr1_A_fumigatus_Af293:4029547-4031693W, translated using codon table 1 (643 amino acids) Uncharacterized ORF; Putative isopropylmalate synthase; transcript highly induced during conidial germination; SrbA-regulated during hypoxia	6.07237	7.31	1	3	3	3	643	71.1504	5.68115
Afu4g06690	Afu4g06690 AspGDID:ASPL0000106383 COORDS:Chr4_A_fumigatus_Af293:1733950-1731132C, translated using codon table 1 (859 amino acids) Uncharacterized ORF; Ortholog(s) have nucleotide binding, ribonucleoside-diphosphate reductase activity, thioredoxin disulfide as acceptor activity	6.06827	3.03	1	2	2	2	859	96.0463	6.66846
Afu2g14970	Afu2g14970 AspGDID:ASPL0000104212 COORDS:Chr2_A_fumigatus_Af293:3944757-3943306C, translated using codon table 1 (483 amino acids) Uncharacterized ORF; Gamma-butyrobetaine hydroxylase subfamily protein	6.0527	6.83	1	3	3	3	483	56.6704	8.29443
Afu5g09910	Afu5g09910 AspGDID:ASPL0000108059 COORDS:Chr5_A_fumigatus_Af293:2564144-2563392C, translated using codon table 1 (217 amino acids) Uncharacterized ORF; Putative p-nitroreductase family protein; protein induced by heat shock; Yap1-dependent induction in response to hydrogen peroxide; induced by gliotoxin exposure	6.03229	14.29	1	3	3	3	217	24.2985	5.90967
Afu7g02340	Afu7g02340 AspGDID:ASPL0000110029 COORDS:Chr7_A_fumigatus_Af293:635304-636088W, translated using codon table 1 (168 amino acids) Uncharacterized ORF; Ortholog(s) have role in isoleucine biosynthetic process, mitochondrial translation and mitochondrial matrix localization	5.97597	13.1	1	2	2	2	168	18.0041	8.82178
Afu5g06320	Afu5g06320 AspGDID:ASPL0000107708 COORDS:Chr5_A_fumigatus_Af293:1519087-1518035C, translated using codon table 1 (169 amino acids) Uncharacterized ORF; Ortholog(s) have role in cellular protein localization, cytokinesis, site selection, endoplasmic reticulum inheritance, endoplasmic reticulum tubular network organization, nuclear pore complex assembly, vesicle-mediated transport	5.92028	13.02	1	2	2	2	169	19.0569	8.33838
Afu5g00650	Afu5g00650 AspGDID:ASPL0000107249 COORDS:Chr5_A_fumigatus_Af293:183963-182941C, translated using codon table 1 (340 amino acids) Uncharacterized ORF; Protein of unknown function; transcript induced by exposure to human airway epithelial cells	5.91444	5.29	1	2	2	2	340	38.2843	6.45557
Afu1g14550	sod3 AspGDID:ASPL0000102522 COORDS:Chr1_A_fumigatus_Af293:3887266-3888013W, translated using codon table 1 (210 amino acids) Verified ORF; Putative manganese superoxide dismutase; allergen Asp f 6; recognized by IgE from allergic patients; expressed only in hyphae; transcript up-regulated in hyphae exposed to neutrophils and to amphotericin B	5.8035	15.24	1	2	2	2	210	23.3758	7.73779
Afu6g12500	Afu6g12500 AspGDID:ASPL0000109594 COORDS:Chr6_A_fumigatus_Af293:3156604-3155495C, translated using codon table 1 (220 amino acids) Uncharacterized ORF; Ortholog(s) have cytosol, mitochondrion, nucleus localization	5.79796	9.09	1	2	2	2	220	23.7052	8.38232
Afu6g08850	Afu6g08850 AspGDID:ASPL0000109241 COORDS:Chr6_A_fumigatus_Af293:2101762-2102788W, translated using codon table 1 (313 amino acids) Uncharacterized ORF; Ubiquinone biosynthesis methlytransferase; hypoxia induced protein	5.78506	9.9	1	2	2	2	313	35.2495	8.70459
Afu4g03322	Afu4g03322 AspGDID:ASPL0000365151 COORDS:Chr4_A_fumigatus_Af293:944673-943800C, translated using codon table 1 (257 amino acids) Uncharacterized ORF; Ortholog of <i>A. nidulans FGSC A4</i> : AN7177, <i>A. niger CBS 513.88</i> : An14g01990, <i>A. oryzae RIB40</i> : AO090011000139, <i>Aspergillus sydowii</i> : Aspsy1_0052594 and <i>Aspergillus terreus NIH2624</i> : ATET_02136	5.77948	8.95	1	2	2	2	257	28.9266	4.86865
Afu2g06040	Afu2g06040 AspGDID:ASPL0000103427 COORDS:Chr2_A_fumigatus_Af293:1706686-1708648W, translated using codon table 1 (612 amino acids) Uncharacterized ORF; Putative actin cortical patch component	5.71227	5.56	1	2	2	2	612	65.1426	6.41748
Afu4g13700	Afu4g13700 AspGDID:ASPL0000107076 COORDS:Chr4_A_fumigatus_Af293:3586027-3588483W, translated using codon table 1 (737 amino acids) Uncharacterized ORF; Ortholog(s) have cytosol localization	5.66314	3.26	1	2	2	2	737	84.4129	7.09326
Afu3g14680	plb3 AspGDID:ASPL0000105858 COORDS:Chr3_A_fumigatus_Af293:3893246-3895138W, translated using codon table 1 (630 amino acids) Uncharacterized ORF; Putative secreted lysophospholipase B; transcript induced by lecithin and by voriconazole; hypoxia induced protein; induced by exposure to artemisinin	5.63562	6.19	1	2	2	2	630	67.3745	5.65576
Afu2g15490	Afu2g15490 AspGDID:ASPL0000104266 COORDS:Chr2_A_fumigatus_Af293:4088650-4086962C, translated using codon table 1 (562 amino acids) Uncharacterized ORF; Ortholog(s) have intracellular localization	5.51956	4.8	1	2	2	2	562	63.1281	5.60498
Afu2g10920	Afu2g10920 AspGDID:ASPL0000103807 COORDS:Chr2_A_fumigatus_Af293:2813917-2812855C, translated using codon table 1 (294 amino acids) Uncharacterized ORF; Putative enoyl-CoA hydratase/isomerase family protein with a predicted role in beta oxidation of fatty acids; transcript up-regulated in conidia exposed to neutrophils	5.50308	7.82	1	2	2	2	294	31.5663	8.55811
Afu2g07960	Afu2g07960 AspGDID:ASPL0000103516 COORDS:Chr2_A_fumigatus_Af293:2038888-2047447W, translated using codon table 1 (2674 amino acids) Uncharacterized ORF; Ortholog(s) have role in regulation of translational elongation and cytosolic ribosome, extracellular region, mitochondrion localization	5.46309	0.93	1	2	2	2	2674	291.954	5.85889
Afu4g09110	ccp1 AspGDID:ASPL0000106626 COORDS:Chr4_A_fumigatus_Af293:2379568-2378394C, translated using codon table 1 (366 amino acids) Uncharacterized ORF; Putative cytochrome c peroxidase; protein induced by heat shock and by hydrogen peroxide; transcript up-regulated in conidia exposed to neutrophils	5.37208	6.83	1	2	2	2	366	40.3542	8.55811
Afu4g11050	Afu4g11050 AspGDID:ASPL0000106815 COORDS:Chr4_A_fumigatus_Af293:2878131-2879794W, translated using codon table 1 (496 amino acids) Uncharacterized ORF; Putative NADH-ubiquinone oxidoreductase, subunit F involved in oxidative phosphorylation; induced by exposure to artemisinin	5.2482	5.04	1	2	2	2	496	54.5252	8.1333
Afu5g08830	hexA AspGDID:ASPL0000107954 COORDS:Chr5_A_fumigatus_Af293:2265787-2268175W, translated using codon table 1 (537 amino acids) Verified ORF; Putative woronin body protein; hypoxia repressed protein	5.231	3.35	1	2	2	2	537	61.3693	8.79248
Afu3g10700	Afu3g10700 AspGDID:ASPL0000105468 COORDS:Chr3_A_fumigatus_Af293:2775082-2775739W, translated using codon table 1 (193 amino acids) Uncharacterized ORF; Ortholog(s) have mRNA binding, structural molecule activity and role in Arp2/3 complex-mediated actin nucleation, actin cortical patch assembly, cellular response to drug, mitochondrion inheritance	5.14755	13.47	1	2	2	2	193	20.5543	5.60498
Afu1g06940	Afu1g06940 AspGDID:ASPL0000101862 COORDS:Chr1_A_fumigatus_Af293:1983163-1981801C, translated using codon table 1 (412 amino acids) Uncharacterized ORF; Ortholog(s) have FMN binding, chorismate synthase activity, riboflavin reductase (NADPH) activity, role in aromatic amino acid family biosynthetic process and cytosol, nucleus localization	4.96675	10.19	1	2	2	2	412	44.158	6.53662
Afu1g02410	Afu1g02410 AspGDID:ASPL0000101411 COORDS:Chr1_A_fumigatus_Af293:702057-703574W, translated using codon table 1 (469 amino acids) Uncharacterized ORF; Ortholog(s) have ATP-dependent 3'-5' DNA helicase activity, ATP-dependent 5'-3' DNA helicase activity and role in box C/D snoRNP assembly, histone exchange, rRNA processing, regulation of transcription from RNA polymerase II promoter	4.96464	4.48	1	2	2	2	469	51.3145	5.8335
Afu5g10370	sdh2 AspGDID:ASPL0000108103 COORDS:Chr5_A_fumigatus_Af293:2655836-2654821C, translated using codon table 1 (299 amino acids) Uncharacterized ORF; Iron-sulfur protein subunit of succinate dehydrogenase with a predicted role in the citric acid cycle; transcript up-regulated in conidia exposed to neutrophils; induced by exposure to artemisinin; transcript downregulated by hypoxia	4.1183	8.36	1	2	2	2	299	33.894	8.92432
Afu2g05340	gel4 AspGDID:ASPL0000103358 COORDS:Chr2_A_fumigatus_Af293:1487091-1488862W, translated using codon table 1 (532 amino acids) Verified ORF; Essential 1,3-beta-glucanosyltransferase, GPI-anchored to the plasma membrane; constitutively expressed during hyphal growth; hypoxia induced protein	3.81136	4.14	1	2	2	2	532	57.0832	5.0083
Afu4g09010	Afu4g09010 AspGDID:ASPL0000106616 COORDS:Chr4_A_fumigatus_Af293:2336585-2339048W, translated using codon table 1 (597 amino acids) Uncharacterized ORF; Ortholog(s) have U1 snRNP localization	3.74593	3.02	1	2	2	2	597	68.239	5.26221
Afu2g17130	Afu2g17130 AspGDID:ASPL0000104429 COORDS:Chr2_A_fumigatus_Af293:4574963-4576567W, translated using codon table 1 (487 amino acids) Uncharacterized ORF; Ortholog(s) have protein kinase regulator activity	3.07386	7.6	1	2	2	2	487	53.4666	6.13818
Afu2g08440	Afu2g08440 AspGDID:ASPL0000103563 COORDS:Chr2_A_fumigatus_Af293:2168008-2176342W, translated using codon table 1 (2523 amino acids) Uncharacterized ORF; Has domain(s) with predicted ubiquitinyl hydrolase activity and role in ubiquitin-dependent protein catabolic process	2.60075	1.7	1	2	2	2	2523	284.911	5.2749
Afu1g16780	Afu1g16780 AspGDID:ASPL0000102743 COORDS:Chr1_A_fumigatus_Af293:4578362-4576093C, translated using codon table 1 (664 amino acids) Uncharacterized ORF; Ortholog(s) have protein serine/threonine kinase activity	2.39206	5.27	1	2	2	2	664	74.2838	9.36377
Afu3g04150	Afu3g04150 AspGDID:ASPL0000104931 COORDS:Chr3_A_fumigatus_Af293:1171784-1173124W, translated using codon table 1 (423 amino acids) Uncharacterized ORF; Ortholog(s) have enoyl-[acyl-carrier-protein] reductase activity, role in aerobic respiration, fatty acid biosynthetic process and mitochondrion localization	2.02362	7.8	1	2	2	2	423	46.5672	9.24658
Afu6g14280	Afu6g14280 AspGDID:ASPL0000109767 COORDS:Chr6_A_fumigatus_Af293:3632901-3631292C, translated using codon table 1 (517 amino acids) Uncharacterized ORF; Protein of unknown function; calcium downregulated	0	6.38	1	2	2	2	517	58.3702	9.23193
