# Supplementary material for: The Pheromone Module SteC-MkkB-MpkB-SteD-HamE Regulates Development, Stress Responses and Secondary Metabolism in Aspergillus fumigatus
Source: Front Microbiol. 2020 May 7;11:811. doi: 10.3389/fmicb.2020.00811 (PMC7223695; doi:10.3389/fmicb.2020.00811)
Supplement: Supplementary file 8 [file Table_7.XLSX]

## Sheet: Sheet1
Table S7: Aspergillus fumigatus SteD-GFP interacting proteins (Vegetative growth-24 hours)
Accession	Description	Score	Coverage	# Proteins	# Unique Peptides	# Peptides	# PSMs	# AAs	MW [kDa]	calc. pI
Afu2g17130	Afu2g17130 AspGDID:ASPL0000104429 COORDS:Chr2_A_fumigatus_Af293:4574963-4576567W, translated using codon table 1 (487 amino acids) Uncharacterized ORF; Ortholog(s) have protein kinase regulator activity	106.389	53.18	1	16	16	24	487	53.4666	6.13818
Afu5g06420	Afu5g06420 AspGDID:ASPL0000107718 COORDS:Chr5_A_fumigatus_Af293:1549998-1553242W, translated using codon table 1 (1007 amino acids) Uncharacterized ORF; Ortholog(s) have MAP kinase kinase kinase activity, SAM domain binding activity	101.567	31.68	1	23	23	27	1007	111.606	8.60205
Afu1g12680	Afu1g12680 AspGDID:ASPL0000102336 COORDS:Chr1_A_fumigatus_Af293:3351052-3347476C, translated using codon table 1 (1072 amino acids) Uncharacterized ORF; Ortholog(s) have Rho GTPase activator activity	27.4747	5.97	1	5	5	6	1072	117.677	6.771
Afu1g03010	Afu1g03010 AspGDID:ASPL0000101471 COORDS:Chr1_A_fumigatus_Af293:869019-866374C, translated using codon table 1 (881 amino acids) Uncharacterized ORF; Ortholog(s) have U2-type spliceosomal complex localization	25.4042	12.37	1	8	8	9	881	100.781	9.94971
Afu5g06820	Afu5g06820 AspGDID:ASPL0000107758 COORDS:Chr5_A_fumigatus_Af293:1678782-1677790C, translated using codon table 1 (330 amino acids) Uncharacterized ORF; Ortholog of <i>A. niger CBS 513.88</i> : An03g00400, <i>A. oryzae RIB40</i> : AO090701000306, <i>Neosartorya fischeri NRRL 181</i> : NFIA_036290 and <i>Aspergillus niger ATCC 1015</i> : 45807-mRNA	22.7412	17.58	1	3	3	6	330	37.6813	7.04932
Afu6g07980	Afu6g07980 AspGDID:ASPL0000109158 COORDS:Chr6_A_fumigatus_Af293:1850730-1849524C, translated using codon table 1 (323 amino acids) Uncharacterized ORF; Ortholog(s) have RNA polymerase II core binding, cyclin-dependent protein serine/threonine kinase activity, histone binding activity	19.9977	21.05	1	6	6	7	323	36.6309	7.59131
Afu1g06170	Afu1g06170 AspGDID:ASPL0000101785 COORDS:Chr1_A_fumigatus_Af293:1784284-1782664C, translated using codon table 1 (464 amino acids) Uncharacterized ORF; Ortholog(s) have role in positive regulation of RNA polymerase II transcriptional preinitiation complex assembly, proteasome regulatory particle assembly, ubiquitin-dependent protein catabolic process	19.7883	18.32	1	6	6	6	464	51.6705	4.97021
Afu4g11830	Afu4g11830 AspGDID:ASPL0000106891 COORDS:Chr4_A_fumigatus_Af293:3122796-3124999W, translated using codon table 1 (713 amino acids) Uncharacterized ORF; Ortholog(s) have U2-type spliceosomal complex localization	15.8926	8.42	1	4	4	5	713	83.3627	7.12256
Afu1g12920	glpV AspGDID:ASPL0000102360 COORDS:Chr1_A_fumigatus_Af293:3420644-3417594C, translated using codon table 1 (879 amino acids) Uncharacterized ORF; Putative glycogen phosphorylase; transcript up-regulated in conidia exposed to neutrophils	15.799	4.55	1	2	2	3	879	100.25	6.03662
Afu6g03810	Afu6g03810 AspGDID:ASPL0000108836 COORDS:Chr6_A_fumigatus_Af293:840093-839212C, translated using codon table 1 (255 amino acids) Uncharacterized ORF; Putative mitochondrial ATP synthase D chain; hypoxia induced protein	13.0475	20.78	1	3	3	3	255	28.6782	9.0415
Afu5g00730	Afu5g00730 AspGDID:ASPL0000107257 COORDS:Chr5_A_fumigatus_Af293:208755-205171C, translated using codon table 1 (1067 amino acids) Uncharacterized ORF; Has domain(s) with predicted cation-transporting ATPase activity, metal ion binding, nucleotide binding activity, role in cation transport and integral component of membrane localization	12.621	6	1	4	4	4	1067	117.418	7.72314
Afu5g08310	Afu5g08310 AspGDID:ASPL0000107903 COORDS:Chr5_A_fumigatus_Af293:2110783-2111831W, translated using codon table 1 (334 amino acids) Uncharacterized ORF; Has domain(s) with predicted nucleic acid binding, nucleotide binding activity	12.3564	14.07	1	4	4	4	334	36.4593	6.82959
Afu6g12740	Afu6g12740 AspGDID:ASPL0000109617 COORDS:Chr6_A_fumigatus_Af293:3219940-3220875W, translated using codon table 1 (245 amino acids) Uncharacterized ORF; Dienelactone hydrolase family protein	10.4417	15.51	1	3	3	3	245	26.9258	6.63916
Afu4g03160	Afu4g03160 AspGDID:ASPL0000106134 COORDS:Chr4_A_fumigatus_Af293:886361-887395W, translated using codon table 1 (344 amino acids) Uncharacterized ORF; Ortholog(s) have U2-type spliceosomal complex, cytosol localization	10.1397	7.27	1	2	2	3	344	37.7829	5.8208
Afu1g04210	Afu1g04210 AspGDID:ASPL0000101588 COORDS:Chr1_A_fumigatus_Af293:1202857-1199114C, translated using codon table 1 (1225 amino acids) Uncharacterized ORF; Ortholog(s) have cytosol, nuclear envelope localization	9.49324	3.43	1	3	3	3	1225	139.512	6.44287
Afu2g16020	Afu2g16020 AspGDID:ASPL0000104319 COORDS:Chr2_A_fumigatus_Af293:4237810-4239808W, translated using codon table 1 (566 amino acids) Uncharacterized ORF; Putative heat shock protein; transcript induced during conidial germination	9.33487	8.83	1	3	3	3	566	61.6862	6.87354
Afu5g07890	Afu5g07890 AspGDID:ASPL0000107861 COORDS:Chr5_A_fumigatus_Af293:1979250-1978604C, translated using codon table 1 (149 amino acids) Uncharacterized ORF; Putative single-stranded DNA binding protein family member	8.76971	28.86	1	4	4	4	149	16.2432	9.68604
Afu8g02620	Afu8g02620 AspGDID:ASPL0000110698 COORDS:Chr8_A_fumigatus_Af293:695141-693100C, translated using codon table 1 (607 amino acids) Uncharacterized ORF; Ortholog of <i>A. nidulans FGSC A4</i> : AN10344, <i>A. niger CBS 513.88</i> : An03g06730, <i>A. oryzae RIB40</i> : AO090010000752, <i>Neosartorya fischeri NRRL 181</i> : NFIA_096330 and <i>Aspergillus wentii</i> : Aspwe1_0033226	8.63094	4.61	1	2	2	2	607	68.8607	4.65283
Afu4g06890	cyp51A AspGDID:ASPL0000106403 COORDS:Chr4_A_fumigatus_Af293:1785331-1783713C, translated using codon table 1 (515 amino acids) Verified ORF; 14-alpha sterol demethylase; commonly mutated in drug resistant isolates; putative ortholog of A. nidulans pdmA; transcript induced by exposure to fluconazole and voriconazole; SrbA-regulated during hypoxia	8.54294	9.13	1	3	3	3	515	58.0308	8.52881
Afu4g08040	Afu4g08040 AspGDID:ASPL0000106518 COORDS:Chr4_A_fumigatus_Af293:2090716-2089786C, translated using codon table 1 (218 amino acids) Uncharacterized ORF; Ortholog(s) have GTP binding activity	8.19337	14.22	1	2	2	2	218	23.7153	8.54346
Afu1g06710	Afu1g06710 AspGDID:ASPL0000101839 COORDS:Chr1_A_fumigatus_Af293:1922660-1920607C, translated using codon table 1 (564 amino acids) Uncharacterized ORF; Ortholog(s) have chaperonin-containing T-complex, nucleus localization	7.86781	7.27	1	2	2	2	564	60.9935	6.34131
Afu5g01950	Afu5g01950 AspGDID:ASPL0000107375 COORDS:Chr5_A_fumigatus_Af293:500329-499510C, translated using codon table 1 (138 amino acids) Uncharacterized ORF; Ortholog(s) have chromatin binding activity	7.73269	19.57	1	3	3	3	138	14.7813	10.3745
Afu5g04160	Afu5g04160 AspGDID:ASPL0000107595 COORDS:Chr5_A_fumigatus_Af293:1105009-1106759W, translated using codon table 1 (537 amino acids) Uncharacterized ORF; NTF2 and RRM domain protein	7.57874	9.87	1	2	2	2	537	56.9011	5.18604
Afu5g06320	Afu5g06320 AspGDID:ASPL0000107708 COORDS:Chr5_A_fumigatus_Af293:1519087-1518035C, translated using codon table 1 (169 amino acids) Uncharacterized ORF; Ortholog(s) have role in cellular protein localization, cytokinesis, site selection, endoplasmic reticulum inheritance, endoplasmic reticulum tubular network organization, nuclear pore complex assembly, vesicle-mediated transport	6.98528	13.02	1	2	2	2	169	19.0569	8.33838
Afu1g09550	Afu1g09550 AspGDID:ASPL0000102021 COORDS:Chr1_A_fumigatus_Af293:2468785-2469303W, translated using codon table 1 (143 amino acids) Uncharacterized ORF; Ortholog(s) have role in dynein-driven meiotic oscillatory nuclear movement, karyogamy involved in conjugation with cellular fusion, reciprocal meiotic recombination	6.9157	22.38	1	2	2	2	143	15.3157	5.45264
Afu8g05440	atp4 AspGDID:ASPL0000110874 COORDS:Chr8_A_fumigatus_Af293:1265282-1266290W, translated using codon table 1 (274 amino acids) Uncharacterized ORF; Mitochondrial ATPase subunit; hypoxia repressed protein	6.81554	8.39	1	2	2	2	274	29.7087	9.34912
Afu1g09840	tim44 AspGDID:ASPL0000102050 COORDS:Chr1_A_fumigatus_Af293:2554479-2552871C, translated using codon table 1 (515 amino acids) Uncharacterized ORF; Mitochondrial inner membrane translocase subunit	6.67259	5.83	1	2	2	2	515	57.7095	9.11475
Afu6g06345	Afu6g06345 AspGDID:ASPL0000108995 COORDS:Chr6_A_fumigatus_Af293:1347575-1348344W, translated using codon table 1 (205 amino acids) Uncharacterized ORF; Ortholog(s) have 6,7-dimethyl-8-ribityllumazine synthase activity, role in riboflavin biosynthetic process and mitochondrial intermembrane space, nucleus localization	6.4203	19.51	1	2	2	2	205	21.5393	6.1001
Afu6g08720	Afu6g08720 AspGDID:ASPL0000109228 COORDS:Chr6_A_fumigatus_Af293:2067644-2066477C, translated using codon table 1 (342 amino acids) Uncharacterized ORF; Putative 5'-methylthioadenosine phosphorylase; transcript induced by exposure to human airway epithelial cells	6.17629	7.31	1	2	2	2	342	37.582	7.38623
Afu2g12400	Afu2g12400 AspGDID:ASPL0000103954 COORDS:Chr2_A_fumigatus_Af293:3185304-3186292W, translated using codon table 1 (227 amino acids) Uncharacterized ORF; Putative ATP synthase oligomycin sensitivity conferral protein	6.00785	9.25	1	2	2	2	227	24.3742	9.64209
Afu5g02850	Afu5g02850 AspGDID:ASPL0000107464 COORDS:Chr5_A_fumigatus_Af293:754834-756051W, translated using codon table 1 (324 amino acids) Uncharacterized ORF; Has domain(s) with predicted arylformamidase activity and role in tryptophan catabolic process to kynurenine	5.92753	12.65	1	3	3	3	324	36.303	5.21143
Afu4g03322	Afu4g03322 AspGDID:ASPL0000365151 COORDS:Chr4_A_fumigatus_Af293:944673-943800C, translated using codon table 1 (257 amino acids) Uncharacterized ORF; Ortholog of <i>A. nidulans FGSC A4</i> : AN7177, <i>A. niger CBS 513.88</i> : An14g01990, <i>A. oryzae RIB40</i> : AO090011000139, <i>Aspergillus sydowii</i> : Aspsy1_0052594 and <i>Aspergillus terreus NIH2624</i> : ATET_02136	5.88438	8.95	1	2	2	3	257	28.9266	4.86865
Afu3g10240	Afu3g10240 AspGDID:ASPL0000105422 COORDS:Chr3_A_fumigatus_Af293:2649693-2642482C, translated using codon table 1 (2327 amino acids) Uncharacterized ORF; Ortholog(s) have cytosol, nucleus localization	5.87452	1.12	1	3	3	3	2327	258.955	5.94775
Afu5g07370	Afu5g07370 AspGDID:ASPL0000107811 COORDS:Chr5_A_fumigatus_Af293:1844081-1842511C, translated using codon table 1 (500 amino acids) Uncharacterized ORF; Ortholog(s) have metal ion binding, poly(A)-specific ribonuclease activity	5.7616	4.6	1	2	2	2	500	53.7507	7.07861
Afu5g05680	Afu5g05680 AspGDID:ASPL0000107645 COORDS:Chr5_A_fumigatus_Af293:1322763-1324274W, translated using codon table 1 (464 amino acids) Uncharacterized ORF; Ortholog(s) have translation release factor activity, codon specific activity and role in asexual sporulation resulting in formation of a cellular spore, cellular response to nitrogen starvation, cytokinesis, translational termination	5.71539	4.96	1	2	2	2	464	51.8989	6.48096
Afu2g04710	Afu2g04710 AspGDID:ASPL0000103297 COORDS:Chr2_A_fumigatus_Af293:1288894-1287776C, translated using codon table 1 (217 amino acids) Uncharacterized ORF; Has domain(s) with predicted heme binding activity	5.53207	10.14	1	2	2	2	217	23.8966	5.59229
Afu3g11300	prs2 AspGDID:ASPL0000105528 COORDS:Chr3_A_fumigatus_Af293:2959483-2958408C, translated using codon table 1 (254 amino acids) Uncharacterized ORF; Putative proteasome component	5.47913	12.99	1	3	3	3	254	27.9201	6.37939
Afu1g02150	Afu1g02150 AspGDID:ASPL0000101385 COORDS:Chr1_A_fumigatus_Af293:639645-637892C, translated using codon table 1 (519 amino acids) Uncharacterized ORF; Ortholog(s) have glycerol-3-phosphate dehydrogenase [NAD+] activity and role in NADH oxidation, cell-abiotic substrate adhesion, glycerol biosynthetic process, intracellular accumulation of glycerol	5.35049	8.09	1	2	2	2	519	56.4221	8.19189
Afu1g09930	gcy1 AspGDID:ASPL0000102059 COORDS:Chr1_A_fumigatus_Af293:2570399-2571627W, translated using codon table 1 (349 amino acids) Uncharacterized ORF; Putative glycerol dehydrogenase; protein level decreases upon heat shock; transcript up-regulated in conidia exposed to neutrophils	5.01813	5.73	1	2	2	2	349	39.1061	8.83643
Afu6g04010	Afu6g04010 AspGDID:ASPL0000108856 COORDS:Chr6_A_fumigatus_Af293:901498-904822W, translated using codon table 1 (962 amino acids) Uncharacterized ORF; Ortholog(s) have importin-alpha export receptor activity, role in cell division, protein export from nucleus and nuclear membrane localization	4.7654	3.22	1	2	2	2	962	108.421	5.37646
Afu6g03440	Afu6g03440 AspGDID:ASPL0000108799 COORDS:Chr6_A_fumigatus_Af293:738342-736781C, translated using codon table 1 (497 amino acids) Uncharacterized ORF; Putative fructosyl amine; transcript induced by voriconazole	4.5979	4.43	1	2	2	2	497	54.895	5.75732
Afu8g03990	Afu8g03990 AspGDID:ASPL0000110734 COORDS:Chr8_A_fumigatus_Af293:855176-851942C, translated using codon table 1 (985 amino acids) Uncharacterized ORF; Ortholog(s) have U5 snRNP, cytosol, spliceosomal complex localization	4.2257	3.05	1	2	3	3	985	110.12	5.08447
Afu2g13040	grpE AspGDID:ASPL0000104018 COORDS:Chr2_A_fumigatus_Af293:3347479-3346582C, translated using codon table 1 (250 amino acids) Uncharacterized ORF; Mitochondrial co-chaperone; protein level decreases upon heat shock	4.02566	11.2	1	2	2	2	250	28.3728	8.25049
Afu5g03690	Afu5g03690 AspGDID:ASPL0000107547 COORDS:Chr5_A_fumigatus_Af293:987794-986454C, translated using codon table 1 (424 amino acids) Uncharacterized ORF; Ortholog(s) have phosphatidylinositol transporter activity	3.30098	7.55	1	2	2	2	424	46.141	4.84326
Afu2g09490	Afu2g09490 AspGDID:ASPL0000103667 COORDS:Chr2_A_fumigatus_Af293:2422679-2427552W, translated using codon table 1 (1525 amino acids) Uncharacterized ORF; Eukaryotic translation initiation factor subunit eIF-4F	2.85945	2.69	1	2	2	2	1525	163.883	9.36377
Afu4g07650	cyp6 AspGDID:ASPL0000106480 COORDS:Chr4_A_fumigatus_Af293:1987776-1988776W, translated using codon table 1 (209 amino acids) Uncharacterized ORF; Putative peptidyl-prolyl cis-trans isomerase	2.2312	9.09	1	2	2	2	209	22.9459	8.27979
Afu4g06790	Afu4g06790 AspGDID:ASPL0000106393 COORDS:Chr4_A_fumigatus_Af293:1755480-1756006W, translated using codon table 1 (93 amino acids) Uncharacterized ORF; Ubiquinol-cytochrome c reductase complex 14 kDa protein with a predicted role in oxidative phosphorylation; induced by exposure to artemisinin	2.23055	43.01	1	2	2	2	93	11.0149	6.31592
Afu6g07540	Afu6g07540 AspGDID:ASPL0000109114 COORDS:Chr6_A_fumigatus_Af293:1715811-1713540C, translated using codon table 1 (548 amino acids) Uncharacterized ORF; Ortholog(s) have chaperonin-containing T-complex localization	2.12033	3.47	1	2	2	2	548	59.8493	5.51611
