# Supplementary material for: The Pheromone Module SteC-MkkB-MpkB-SteD-HamE Regulates Development, Stress Responses and Secondary Metabolism in Aspergillus fumigatus
Source: Front Microbiol. 2020 May 7;11:811. doi: 10.3389/fmicb.2020.00811 (PMC7223695; doi:10.3389/fmicb.2020.00811)
Supplement: Supplementary file 10 [file Table_9.XLSX]

## Sheet: Sheet1
Colour Code
Pseurotin A
Pseurotin D
Pyripyropene A
Fumagillin
PEAK LIST								PEAK LIST								PEAK LIST								PEAK LIST								PEAK LIST								PEAK LIST								PEAK LIST
WT.raw								WT.raw								WT.raw								hamE del.raw								hamE del.raw								hamE del.raw								mkkB del.raw
RT: 7.26 - 10.54								RT: 7.26 - 10.54								RT: 7.26 - 10.54								RT: 7.26 - 10.54								RT: 7.26 - 10.54								RT: 7.26 - 10.54								RT: 7.26 - 10.54
Number of detected peaks: 181								Number of detected peaks: 201								Number of detected peaks: 193								Number of detected peaks: 190								Number of detected peaks: 195								Number of detected peaks: 197								Number of detected peaks: 188
Apex RT	Start RT	End RT	Area	%Area	Height	%Height		Apex RT	Start RT	End RT	Area	%Area	Height	%Height		Apex RT	Start RT	End RT	Area	%Area	Height	%Height		Apex RT	Start RT	End RT	Area	%Area	Height	%Height		Apex RT	Start RT	End RT	Area	%Area	Height	%Height		Apex RT	Start RT	End RT	Area	%Area	Height	%Height		Apex RT	Start RT
0.08	0	0.22	14682.6	0.18	1643.38	0.05		0.1	0	0.24	19415.7	0.26	1987.03	0.06		0.1	0	0.25	19704.4	0.25	1916.02	0.06		0.08	0	0.21	14135.4	0.14	1626.53	0.04		0.04	0	0.21	10359.6	0.11	1267.26	0.03		0.13	0	0.28	25797.1	0.22	2232.47	0.05		0.04	0
0.75	0.62	0.86	13331.1	0.17	1368.85	0.04		0.77	0.64	0.86	11379.7	0.15	1257.73	0.04		0.77	0.65	0.85	8600.3	0.11	1075.42	0.03		0.73	0.61	0.8	8530.27	0.09	1077.48	0.03		0.73	0.61	0.81	9414.67	0.1	1125.84	0.03		0.8	0.68	0.88	8187.55	0.07	1043.03	0.02		0.16	0.11
1.04	0.89	1.22	20187.3	0.25	1507.13	0.04		1.05	0.9	1.23	20672.7	0.28	1577.78	0.05		1.04	0.89	1.22	23449	0.29	1742.96	0.05		1.02	0.84	1.23	32057.9	0.32	2098.74	0.05		1.02	0.85	1.23	30154.9	0.31	1997.78	0.05		1.06	0.91	1.23	19643	0.17	1574.21	0.03		0.78	0.63
1.27	1.25	1.29	300.298	0	186.269	0.01		1.27	1.25	1.29	376.789	0.01	231.075	0.01		1.27	1.25	1.29	381.296	0	235.753	0.01		1.27	1.25	1.29	122.585	0	78.302	0		1.27	1.25	1.29	219.064	0	138	0		1.27	1.25	1.29	225.129	0	141.889	0		1.03	0.91
1.39	1.37	1.42	7176.72	0.09	4473.51	0.13		1.39	1.37	1.42	7564.08	0.1	4709.79	0.14		1.39	1.37	1.42	7732.2	0.1	4817.46	0.14		1.39	1.37	1.42	3486.1	0.04	2170.12	0.05		1.4	1.38	1.42	4036.9	0.04	2472.12	0.06		1.39	1.37	1.42	4360.18	0.04	2697.68	0.06		1.21	1.19
1.49	1.46	1.51	1029.07	0.01	539.071	0.02		1.49	1.46	1.54	1882.79	0.03	633.165	0.02		1.49	1.46	1.53	1817.06	0.02	707.913	0.02		1.49	1.46	1.52	581.119	0.01	280.812	0.01		1.49	1.46	1.55	1137	0.01	313.947	0.01		1.48	1.46	1.53	587.076	0.01	207.94	0		1.27	1.25
1.59	1.57	1.61	138761	1.74	91351.7	2.68		1.59	1.57	1.62	134015	1.81	88368.4	2.63		1.59	1.57	1.61	114598	1.43	77425.5	2.26		1.59	1.58	1.61	92219.2	0.93	63555.3	1.57		1.6	1.58	1.62	125124	1.28	79046.9	1.9		1.59	1.57	1.61	133582	1.16	86318.3	1.87		1.39	1.37
1.67	1.64	1.71	45398.4	0.57	18834.7	0.55		1.67	1.65	1.7	14615.3	0.2	7782.99	0.23		1.67	1.65	1.69	5111.13	0.06	3626.06	0.11		1.65	1.64	1.66	151.538	0	226.407	0.01		1.67	1.65	1.69	7189.93	0.07	5504.04	0.13		1.67	1.64	1.69	25169.8	0.22	13518.9	0.29		1.49	1.46
1.74	1.73	1.75	251.153	0	359.922	0.01		1.75	1.74	1.77	11124.4	0.15	9114.18	0.27		1.72	1.71	1.73	219.645	0	333.025	0.01		1.77	1.75	1.8	13114.7	0.13	8092.14	0.2		1.75	1.73	1.77	14680.9	0.15	9126.22	0.22		1.74	1.73	1.76	912.194	0.01	863.97	0.02		1.6	1.58
1.8	1.78	1.82	13422.4	0.17	9073.72	0.27		1.83	1.79	1.85	28065.8	0.38	11401.5	0.34		1.75	1.74	1.77	3121.27	0.04	2684.12	0.08		1.82	1.8	1.84	3376.32	0.03	2748.16	0.07		1.8	1.79	1.81	476.151	0	628.796	0.02		1.81	1.77	1.85	41503.3	0.36	14962	0.32		1.69	1.67
1.87	1.84	1.91	14562.9	0.18	5928.32	0.17		1.9	1.88	1.94	14207.2	0.19	6220.69	0.19		1.81	1.79	1.82	1600.05	0.02	1567.78	0.05		1.89	1.86	1.92	13229.4	0.13	5786.86	0.14		1.86	1.83	1.89	19856.2	0.2	9200.48	0.22		1.91	1.88	1.95	13941.8	0.12	5173.6	0.11		1.79	1.77
2.36	2.29	2.43	11312	0.14	2060.41	0.06		2.37	2.31	2.44	5684.61	0.08	1088.82	0.03		1.89	1.84	1.94	22039	0.28	5593.88	0.16		2.34	2.3	2.38	1091.89	0.01	365.343	0.01		1.94	1.92	1.96	350.56	0	197.039	0		2.33	2.28	2.38	4125.49	0.04	1070.23	0.02		1.86	1.84
2.73	2.53	2.76	120522	1.51	14243	0.42		2.75	2.52	2.78	156982	2.12	16585.5	0.49		2.33	2.26	2.42	10579.5	0.13	1765.37	0.05		2.42	2.39	2.44	932.207	0.01	503.443	0.01		2.37	2.33	2.4	993.676	0.01	336.986	0.01		2.42	2.4	2.44	650.691	0.01	394.755	0.01		2.12	2.1
2.87	2.85	2.88	224.12	0	171.154	0.01		2.87	2.86	2.89	338.235	0	236.455	0.01		2.58	2.51	2.67	6746.8	0.08	1120.68	0.03		2.75	2.51	2.78	149685	1.51	15544.7	0.38		2.44	2.42	2.46	880.651	0.01	489.866	0.01		2.72	2.51	2.76	125885	1.09	13718	0.3		2.34	2.29
3.06	2.96	3.11	3815.89	0.05	603.918	0.02		3.09	3.05	3.12	865.49	0.01	325.208	0.01		2.73	2.68	2.75	25153.1	0.31	9090.73	0.27		2.87	2.85	2.89	760.966	0.01	496.396	0.01		2.76	2.54	2.79	150639	1.54	16647	0.4		2.87	2.85	2.89	760.496	0.01	501.387	0.01		2.57	2.55
3.28	3.26	3.3	145.488	0	99.761	0		3.29	3.27	3.31	140.633	0	98.035	0		2.86	2.84	2.88	344.9	0	241.298	0.01		2.96	2.94	2.98	66.653	0	41.145	0		2.89	2.87	2.91	828.173	0.01	539.224	0.01		2.96	2.93	2.99	227.711	0	100.374	0		2.73	2.67
3.45	3.43	3.46	68.712	0	51.791	0		3.39	3.34	3.43	922.372	0.01	274.217	0.01		3.08	3.05	3.1	376.358	0	178.922	0.01		3.09	3.06	3.11	152.863	0	98.04	0		3.11	3.07	3.13	559.074	0.01	238.736	0.01		3.09	3.06	3.11	290.599	0	164.276	0		2.9	2.86
3.54	3.53	3.56	136.177	0	104.942	0		3.47	3.45	3.48	25.559	0	25.826	0		3.15	3.13	3.17	69.984	0	50.101	0		3.25	3.2	3.31	2474.37	0.02	512.14	0.01		3.31	3.28	3.35	709.082	0.01	271.04	0.01		3.28	3.26	3.3	152.054	0	103.582	0		3.1	3.08
3.6	3.58	3.62	484.97	0.01	312.275	0.01		3.56	3.54	3.58	124.198	0	98.436	0		3.27	3.25	3.29	220.329	0	140.64	0		3.55	3.53	3.56	77.128	0	66.341	0		3.57	3.55	3.59	135.027	0	101.306	0		3.45	3.44	3.47	34.626	0	31.622	0		3.16	3.14
3.7	3.65	3.74	497.854	0.01	148.578	0		3.62	3.6	3.64	516.894	0.01	326.863	0.01		3.45	3.43	3.46	44.227	0	36.401	0		3.61	3.58	3.63	736.03	0.01	451.885	0.01		3.63	3.6	3.65	932.097	0.01	536.003	0.01		3.55	3.53	3.56	63.682	0	58.15	0		3.28	3.26
3.8	3.78	3.83	498.185	0.01	278.81	0.01		3.81	3.78	3.83	903.329	0.01	446.831	0.01		3.54	3.52	3.56	238.53	0	160.278	0		3.81	3.78	3.84	1305.05	0.01	608.551	0.02		3.81	3.78	3.84	1123.99	0.01	576.35	0.01		3.61	3.58	3.63	866.705	0.01	523.954	0.01		3.45	3.43
4	3.97	4.02	955.568	0.01	492.04	0.01		3.91	3.88	3.93	214.143	0	106.813	0		3.6	3.58	3.62	361.388	0	250.372	0.01		4	3.97	4.02	1892.82	0.02	1014.52	0.03		3.91	3.89	3.93	106.83	0	75.184	0		3.8	3.78	3.83	972.998	0.01	486.425	0.01		3.55	3.53
4.08	4.06	4.1	210.809	0	133.269	0		4	3.97	4.02	471.651	0.01	285.981	0.01		3.8	3.77	3.83	1226.85	0.02	552.009	0.02		4.09	4.06	4.11	191.473	0	115.27	0		4	3.97	4.02	1932.73	0.02	1030.5	0.02		3.89	3.87	3.91	184.113	0	102.32	0		3.61	3.58
4.18	4.16	4.2	192.507	0	128.014	0		4.1	4.08	4.12	176.166	0	114.007	0		4	3.97	4.02	865.574	0.01	456.861	0.01		4.18	4.16	4.2	340.765	0	213.106	0.01		4.13	4.11	4.14	56.66	0	48.389	0		4	3.97	4.03	2092.71	0.02	1088.27	0.02		3.81	3.76
4.31	4.27	4.35	844.776	0.01	280.752	0.01		4.19	4.17	4.21	295.736	0	170.207	0.01		4.08	4.06	4.1	159.631	0	108.036	0		4.29	4.28	4.31	46.95	0	38.249	0		4.19	4.18	4.2	38.482	0	38.992	0		4.09	4.07	4.11	152.886	0	100.965	0		3.88	3.86
4.4	4.38	4.41	37.636	0	35.073	0		4.32	4.28	4.36	665.268	0.01	230.008	0.01		4.18	4.16	4.21	376.294	0	212.914	0.01		4.41	4.38	4.43	1252.13	0.01	653.135	0.02		4.32	4.29	4.35	550.816	0.01	264.179	0.01		4.19	4.17	4.21	197.393	0	139.935	0		4.01	3.98
4.59	4.54	4.61	538.682	0.01	223.497	0.01		4.43	4.4	4.46	317.137	0	146.837	0		4.4	4.38	4.43	243.89	0	137.468	0		4.59	4.59	4.6	15.691	0	25.968	0		4.46	4.44	4.49	835.416	0.01	480.763	0.01		4.28	4.26	4.3	187.294	0	120.601	0		4.1	4.08
4.65	4.63	4.67	1667.39	0.02	984.495	0.03		4.5	4.49	4.51	23.667	0	20.99	0		4.48	4.46	4.5	81.15	0	46.079	0		4.65	4.63	4.68	7426.33	0.08	4286.89	0.11		4.68	4.65	4.7	7052.76	0.07	4104.69	0.1		4.34	4.33	4.36	151.409	0	108.479	0		4.18	4.15
4.76	4.73	4.79	7278.84	0.09	3570.6	0.1		4.61	4.6	4.62	71.727	0	76.078	0		4.65	4.63	4.68	1202.87	0.02	722.628	0.02		4.77	4.74	4.79	5298.82	0.05	2635.41	0.07		4.8	4.77	4.83	4728.75	0.05	2378.78	0.06		4.41	4.39	4.43	655.251	0.01	414.551	0.01		4.28	4.24
4.96	4.93	4.98	6942.68	0.09	3530.98	0.1		4.66	4.64	4.68	1103.56	0.01	682.99	0.02		4.76	4.73	4.79	6857.16	0.09	3307.59	0.1		4.97	4.94	4.99	8389.28	0.08	4265.69	0.11		4.91	4.9	4.92	59.002	0	55.719	0		4.49	4.48	4.51	48.843	0	38.248	0		4.41	4.39
5.09	5.06	5.12	1765.04	0.02	788.032	0.02		4.78	4.75	4.81	7296.48	0.1	3288.57	0.1		4.96	4.93	4.99	7241.87	0.09	3472.61	0.1		5.1	5.07	5.12	625.561	0.01	320.686	0.01		5.01	4.98	5.04	8154.9	0.08	4211.29	0.1		4.66	4.63	4.68	7417.6	0.06	4285.02	0.09		4.49	4.47
5.18	5.16	5.21	365.342	0	200.601	0.01		4.89	4.88	4.9	24.421	0	22.373	0		5.09	5.06	5.12	970.752	0.01	469.99	0.01		5.18	5.16	5.2	1115.26	0.01	604.166	0.01		5.13	5.09	5.15	639.956	0.01	239.683	0.01		4.77	4.74	4.8	5755.58	0.05	2802.23	0.06		4.6	4.57
5.24	5.22	5.26	253.937	0	154.591	0		4.98	4.95	5.01	8532.32	0.12	3893.01	0.12		5.18	5.15	5.2	309.622	0	171.436	0.01		5.25	5.23	5.27	180.687	0	127.789	0		5.21	5.18	5.23	948.28	0.01	558.742	0.01		4.97	4.94	4.99	9018.26	0.08	4386.57	0.1		4.77	4.75
5.39	5.36	5.41	10157	0.13	5543	0.16		5.11	5.08	5.14	976.196	0.01	472.146	0.01		5.39	5.36	5.41	10574.1	0.13	5504.74	0.16		5.31	5.3	5.33	82.61	0	84.586	0		5.27	5.25	5.29	353.887	0	240.367	0.01		5.1	5.09	5.12	99.534	0	77.614	0		4.99	4.95
5.48	5.46	5.51	1853.27	0.02	1095.93	0.03		5.19	5.17	5.22	553.894	0.01	290.849	0.01		5.49	5.47	5.51	1594.23	0.02	965.086	0.03		5.4	5.37	5.42	38173.9	0.39	20254.7	0.5		5.35	5.33	5.37	296.945	0	179.847	0		5.18	5.15	5.2	1329.38	0.01	706.25	0.02		5.1	5.08
5.55	5.53	5.56	136.166	0	115.494	0		5.25	5.23	5.27	297.878	0	184.539	0.01		5.55	5.54	5.56	46.835	0	52.156	0		5.48	5.47	5.5	1191	0.01	840.979	0.02		5.46	5.43	5.48	37622.8	0.39	20106.6	0.48		5.25	5.23	5.27	209.518	0	149.265	0		5.18	5.16
5.63	5.61	5.66	6427.59	0.08	3347.43	0.1		5.33	5.31	5.35	236.251	0	150.101	0		5.63	5.61	5.66	5955.8	0.07	3081.06	0.09		5.54	5.53	5.56	398.448	0	284.302	0.01		5.66	5.64	5.69	7101.08	0.07	3696.67	0.09		5.4	5.37	5.43	40814.1	0.35	21117.8	0.46		5.4	5.37
5.76	5.73	5.78	11278.7	0.14	5366.98	0.16		5.42	5.4	5.44	9893.65	0.13	5398.12	0.16		5.76	5.72	5.79	13848.7	0.17	5692.54	0.17		5.64	5.61	5.67	6628.21	0.07	3539.56	0.09		5.81	5.76	5.84	4404.43	0.05	1468.12	0.04		5.49	5.47	5.51	1439.98	0.01	982.293	0.02		5.49	5.47
5.88	5.86	5.89	310.883	0	239.524	0.01		5.5	5.48	5.52	1037.5	0.01	716.553	0.02		5.88	5.86	5.9	275.842	0	223.017	0.01		5.76	5.72	5.79	4356.57	0.04	1687.88	0.04		5.99	5.96	6.01	2269.75	0.02	1177.36	0.03		5.55	5.53	5.57	375.975	0	272.524	0.01		5.55	5.53
5.93	5.91	5.96	1461.61	0.02	910.219	0.03		5.65	5.62	5.67	6510.35	0.09	3413.89	0.1		5.94	5.92	5.96	1134.29	0.01	737.2	0.02		5.87	5.85	5.89	539.293	0.01	332.462	0.01		6.05	6.04	6.06	37.097	0	42.083	0		5.64	5.62	5.67	6752.27	0.06	3633.23	0.08		5.64	5.62
6.01	5.98	6.05	877.551	0.01	327.943	0.01		5.79	5.76	5.81	9646.6	0.13	4894.61	0.15		6.02	5.99	6.05	689.731	0.01	286.505	0.01		5.94	5.92	5.96	1295.86	0.01	797.599	0.02		6.12	6.09	6.14	720.359	0.01	394.91	0.01		5.76	5.72	5.8	5169.52	0.04	1827.96	0.04		5.77	5.74
6.13	6.11	6.15	456.368	0.01	323.612	0.01		5.88	5.86	5.9	595.577	0.01	380.157	0.01		6.13	6.12	6.14	75.492	0	79.087	0		6	5.98	6.05	927.699	0.01	359.799	0.01		6.19	6.16	6.22	5979.8	0.06	3048.61	0.07		5.88	5.86	5.9	417.11	0	284.446	0.01		5.88	5.86
6.19	6.17	6.21	749.942	0.01	400.803	0.01		5.96	5.94	5.99	2604.92	0.04	1384.24	0.04		6.18	6.16	6.21	2243.34	0.03	1132.94	0.03		6.15	6.13	6.18	2569.77	0.03	1320.75	0.03		6.26	6.25	6.28	107.961	0	105.711	0		5.95	5.93	5.97	1459.69	0.01	897.126	0.02		5.94	5.92
6.3	6.28	6.32	9060.16	0.11	6157.95	0.18		6.04	6.02	6.06	381.893	0.01	241.05	0.01		6.31	6.29	6.33	9037.35	0.11	6038.16	0.18		6.31	6.29	6.34	17401.5	0.18	9892.8	0.24		6.35	6.33	6.38	18828.9	0.19	10700.2	0.26		6.02	6	6.04	220.605	0	128.656	0		6.04	6.02
6.38	6.35	6.42	36517.4	0.46	13439.8	0.39		6.11	6.1	6.13	105.446	0	91.407	0		6.38	6.35	6.42	37089.5	0.46	13192.2	0.39		6.41	6.38	6.43	9236.82	0.09	4631.69	0.11		6.42	6.41	6.44	831.573	0.01	624.482	0.02		6.09	6.07	6.11	337.795	0	261.714	0.01		6.08	6.07
6.48	6.47	6.48	9.666	0	22.161	0		6.18	6.15	6.2	2619.03	0.04	1428.71	0.04		6.48	6.48	6.49	10.262	0	22.878	0		6.53	6.5	6.56	17621.7	0.18	9183.11	0.23		6.51	6.49	6.53	10614	0.11	7016.02	0.17		6.17	6.15	6.2	4428.47	0.04	2426	0.05		6.17	6.12
6.53	6.51	6.56	13009.1	0.16	7587.71	0.22		6.26	6.25	6.27	86.188	0	95.323	0		6.54	6.51	6.56	12743.8	0.16	7613.51	0.22		6.62	6.61	6.64	233.031	0	188.828	0		6.65	6.62	6.67	1436.06	0.01	817.557	0.02		6.32	6.29	6.34	17585.1	0.15	10084.1	0.22		6.31	6.29
6.59	6.58	6.6	181.496	0	192.27	0.01		6.33	6.31	6.34	4461.33	0.06	3377.78	0.1		6.59	6.58	6.61	192.041	0	206.74	0.01		6.69	6.66	6.73	2330.86	0.02	874.598	0.02		6.73	6.7	6.77	5494.02	0.06	2232.31	0.05		6.41	6.39	6.44	8075.09	0.07	4032.31	0.09		6.41	6.38
6.67	6.65	6.7	1987.76	0.02	1072.6	0.03		6.38	6.35	6.41	13606.9	0.18	6813.22	0.2		6.67	6.65	6.7	2856.33	0.04	1447.13	0.04		6.84	6.81	6.87	72125.2	0.73	32429.5	0.8		6.87	6.85	6.9	95553.2	0.98	49050.2	1.18		6.53	6.51	6.56	18445	0.16	9929.86	0.22		6.53	6.51
6.72	6.71	6.73	98.331	0	92.685	0		6.52	6.5	6.55	13611.5	0.18	6996.11	0.21		6.72	6.71	6.74	79.822	0	75.169	0		6.97	6.95	6.98	213.295	0	214.199	0.01		7.01	6.99	7.03	1124.99	0.01	716.269	0.02		6.63	6.62	6.64	29.66	0	40.776	0		6.59	6.57
6.84	6.8	6.87	52346.2	0.66	19927.8	0.58		6.6	6.58	6.62	1362.75	0.02	981.452	0.03		6.83	6.8	6.87	69690.4	0.87	26419.2	0.77		7.01	7	7.02	172.33	0	199.404	0		7.08	7.06	7.1	5673.11	0.06	4164.74	0.1		6.7	6.67	6.74	2376.3	0.02	880.973	0.02		6.7	6.67
6.97	6.97	6.98	24.434	0	37.314	0		6.7	6.67	6.73	3532.73	0.05	1711.38	0.05		6.97	6.96	6.99	211.594	0	197.904	0.01		7.06	7.04	7.08	3459.19	0.03	2504.45	0.06		7.14	7.12	7.17	58182.6	0.6	34827.2	0.84		6.84	6.81	6.87	102593	0.89	47431.7	1.03		6.83	6.81
7	6.99	7.02	178.182	0	187.415	0.01		6.85	6.83	6.88	56912.6	0.77	28688.9	0.86		7.01	7	7.02	176.646	0	188	0.01		7.13	7.1	7.15	51930.5	0.52	31550.8	0.78		7.21	7.2	7.23	8405.96	0.09	6140.18	0.15		6.97	6.95	6.98	432.399	0	381.023	0.01		6.93	6.92
7.06	7.04	7.08	5051.96	0.06	3574.47	0.1		6.96	6.94	6.97	245.622	0	203.167	0.01		7.06	7.04	7.08	5889.24	0.07	4098.28	0.12		7.19	7.17	7.21	4369.58	0.04	3568.41	0.09		7.27	7.25	7.29	3722.81	0.04	2850.64	0.07		7.01	7	7.02	20.65	0	40.921	0		7.07	7.04
7.12	7.1	7.15	37175	0.47	23640.7	0.69		7.01	7	7.01	29.52	0	41.829	0		7.13	7.11	7.15	36358	0.46	23311.6	0.68		7.25	7.22	7.27	5016.88	0.05	3368.91	0.08		7.33	7.31	7.36	12308.4	0.13	7520.39	0.18		7.06	7.04	7.09	7350.27	0.06	4682.51	0.1		7.13	7.11
7.18	7.17	7.2	10202.4	0.13	7611.89	0.22		7.07	7.05	7.09	5788.24	0.08	4100.31	0.12		7.19	7.17	7.21	9334.91	0.12	7036.07	0.21		7.32	7.29	7.34	15758.7	0.16	9153.51	0.23		7.45	7.43	7.48	13791.4	0.14	6904.2	0.17		7.13	7.11	7.15	56632.8	0.49	34685.8	0.75		7.19	7.17
7.24	7.22	7.26	5912.01	0.07	4083.58	0.12		7.14	7.11	7.16	39004.6	0.53	24395.4	0.73		7.24	7.22	7.26	7294.25	0.09	4906.65	0.14		7.42	7.39	7.44	17241	0.17	8953.42	0.22		7.57	7.55	7.59	3000.43	0.03	2052.86	0.05		7.19	7.18	7.21	3855.07	0.03	3277.99	0.07		7.24	7.22
7.31	7.29	7.34	27868.9	0.35	15617.1	0.46		7.2	7.18	7.22	13165.6	0.18	9363.27	0.28		7.32	7.29	7.34	27806.8	0.35	15798.6	0.46		7.52	7.5	7.54	1110.85	0.01	701.175	0.02		7.63	7.61	7.66	4603.82	0.05	2824.02	0.07		7.25	7.23	7.27	5487	0.05	3656.75	0.08		7.31	7.29
7.41	7.38	7.44	8787.3	0.11	3954.02	0.12		7.26	7.24	7.27	6879.08	0.09	4920.86	0.15		7.42	7.39	7.45	8868.5	0.11	4067.99	0.12		7.59	7.57	7.61	4497.43	0.05	2942.97	0.07		7.75	7.72	7.79	72800.7	0.75	28709.8	0.69		7.32	7.3	7.34	17390.5	0.15	10164.4	0.22		7.41	7.39
7.52	7.49	7.54	2888.65	0.04	1421.74	0.04		7.32	7.3	7.35	25849.2	0.35	15490.1	0.46		7.52	7.49	7.55	3251.65	0.04	1410.53	0.04		7.65	7.63	7.67	6546.54	0.07	4235.83	0.1		7.89	7.87	7.92	40844.9	0.42	22295.1	0.54		7.42	7.4	7.45	17441.4	0.15	9235.29	0.2		7.49	7.48
7.59	7.57	7.61	4333.01	0.05	2768.18	0.08		7.43	7.41	7.45	6280.16	0.08	3708.16	0.11		7.59	7.57	7.62	4094.62	0.05	2637.55	0.08		7.74	7.72	7.77	37740.3	0.38	21630.6	0.53		8.06	8.04	8.09	90199.6	0.92	47226.3	1.14		7.53	7.49	7.55	2302.26	0.02	1029.35	0.02		7.53	7.52
7.65	7.63	7.67	4407.74	0.06	2932.1	0.09		7.59	7.57	7.61	2953.39	0.04	1970.32	0.06		7.66	7.64	7.68	4094.44	0.05	2838.3	0.08		7.81	7.79	7.83	2910.17	0.03	2088.16	0.05		8.16	8.14	8.18	9338.72	0.1	6204.35	0.15		7.59	7.57	7.61	4606.37	0.04	3012.68	0.07		7.6	7.57
7.74	7.72	7.77	9402.9	0.12	5823.21	0.17		7.65	7.62	7.67	4604.62	0.06	2735.21	0.08		7.75	7.72	7.81	28220.2	0.35	8052.54	0.24		7.89	7.87	7.92	38870	0.39	22099.6	0.55		8.21	8.19	8.22	610.355	0.01	617.345	0.01		7.65	7.63	7.67	4048.16	0.04	3092.8	0.07		7.65	7.64
7.8	7.78	7.81	887.403	0.01	710.92	0.02		7.76	7.72	7.8	28476.5	0.38	8673.92	0.26		7.9	7.88	7.92	5924.39	0.07	3574.03	0.1		8.02	8	8.05	87484.8	0.88	46656.3	1.15		8.26	8.24	8.27	100.364	0	119.118	0		7.7	7.69	7.71	288.262	0	403.012	0.01		7.7	7.68
7.89	7.87	7.92	6264.38	0.08	3808.39	0.11		7.84	7.83	7.85	113.546	0	139.49	0		8.02	8	8.04	73081.3	0.91	39482.2	1.15		8.1	8.08	8.12	3442.49	0.03	2604.2	0.06		8.37	8.35	8.39	33862.2	0.35	19289.8	0.46		7.75	7.73	7.8	58559.6	0.51	22221.1	0.48		7.78	7.76
8.01	7.99	8.04	70512.5	0.88	37834.6	1.11		7.9	7.87	7.92	6383.32	0.09	3765.63	0.11		8.09	8.08	8.11	2355.49	0.03	1713.07	0.05		8.15	8.14	8.17	1271.16	0.01	1160.88	0.03		8.46	8.44	8.48	2114.78	0.02	1355.07	0.03		7.9	7.87	7.92	36908.4	0.32	20983.4	0.46		7.85	7.83
8.09	8.07	8.11	2815.54	0.04	2115.17	0.06		7.96	7.94	7.98	1194.84	0.02	940.766	0.03		8.16	8.14	8.17	411.5	0.01	411.183	0.01		8.2	8.18	8.22	2059.25	0.02	1587.98	0.04		8.56	8.53	8.58	22569.5	0.23	13257.7	0.32		8.03	8	8.05	100648	0.87	53365.3	1.16		7.89	7.89
8.15	8.14	8.16	484.439	0.01	472.82	0.01		8.04	8.01	8.07	74147.6	1	39631.1	1.18		8.23	8.19	8.26	8224.02	0.1	2809.52	0.08		8.24	8.22	8.26	976.406	0.01	800.782	0.02		8.61	8.59	8.62	556.507	0.01	570.56	0.01		8.11	8.09	8.13	4228.39	0.04	3171.85	0.07		8.02	8
8.22	8.18	8.25	9539.54	0.12	3251.02	0.1		8.12	8.1	8.13	482.34	0.01	514.17	0.02		8.33	8.29	8.36	15945.9	0.2	5795.81	0.17		8.32	8.29	8.36	30559	0.31	12633.5	0.31		8.71	8.65	8.79	3.3415e+06	34.22	966781	23.28		8.16	8.14	8.17	915.207	0.01	899.501	0.02		8.1	8.08
8.33	8.29	8.37	31368.5	0.39	10176.6	0.3		8.16	8.14	8.17	546.871	0.01	534.647	0.02		8.39	8.37	8.41	5313.64	0.07	3475.62	0.1		8.45	8.42	8.48	2744.46	0.03	1168.44	0.03		8.87	8.84	8.89	21183.1	0.22	11257.1	0.27		8.2	8.19	8.22	2848.05	0.02	2090.29	0.05		8.23	8.2
8.44	8.42	8.46	1325.43	0.02	1050.75	0.03		8.2	8.19	8.21	113.607	0	130.417	0		8.45	8.44	8.46	106.062	0	143.968	0		8.56	8.53	8.58	29064.4	0.29	15061.7	0.37		8.95	8.93	8.97	11489.3	0.12	7240.95	0.17		8.25	8.23	8.26	861.309	0.01	744.343	0.02		8.34	8.29
8.48	8.47	8.49	94.127	0	126.06	0		8.24	8.22	8.26	888.803	0.01	667.04	0.02		8.48	8.47	8.5	369.957	0	389.039	0.01		8.71	8.65	8.78	3.64766e+06	36.85	1.02368e+06	25.25		9.06	9.04	9.09	503341	5.15	274309	6.6		8.32	8.29	8.34	11683.4	0.1	6358.7	0.14		8.43	8.42
8.56	8.54	8.59	24064.9	0.3	13624.5	0.4		8.35	8.31	8.4	43249.6	0.58	12164.9	0.36		8.57	8.54	8.59	25838.9	0.32	14425.5	0.42		8.87	8.84	8.89	27286.3	0.28	14546.7	0.36		9.2	9.18	9.23	505252	5.17	271354	6.53		8.39	8.37	8.41	28995.2	0.25	17375.2	0.38		8.47	8.46
8.71	8.65	8.78	2.25291e+06	28.26	695534	20.4		8.47	8.44	8.49	4807.95	0.06	2488.21	0.07		8.72	8.66	8.79	2.24261e+06	28.07	685847	20.04		8.93	8.91	8.96	4984.59	0.05	3332.82	0.08		9.38	9.35	9.41	46841	0.48	23810.3	0.57		8.48	8.46	8.49	786.397	0.01	701.727	0.02		8.55	8.51
8.86	8.84	8.89	12892.4	0.16	6927.26	0.2		8.56	8.54	8.59	29497.5	0.4	16134.4	0.48		8.81	8.8	8.83	1994.08	0.02	1712.5	0.05		9.05	9.03	9.08	500947	5.06	272955	6.73		9.47	9.45	9.49	11764	0.12	7545.12	0.18		8.57	8.54	8.61	45271.8	0.39	18236.1	0.4		8.72	8.66
8.93	8.91	8.95	4034.05	0.05	2653.49	0.08		8.71	8.65	8.79	2.11648e+06	28.53	667284	19.9		8.87	8.85	8.9	10551.4	0.13	6455.46	0.19		9.2	9.17	9.22	478705	4.84	262421	6.47		9.54	9.52	9.56	33720.7	0.35	22886.5	0.55		8.72	8.66	8.79	3.79305e+06	32.91	1.09964e+06	23.86		8.87	8.84
9.05	9.03	9.08	380251	4.77	210162	6.16		8.8	8.79	8.82	1951.6	0.03	1711.86	0.05		8.94	8.92	8.96	4225.95	0.05	2800.61	0.08		9.28	9.27	9.3	1832.8	0.02	1729.4	0.04		9.61	9.58	9.63	169609	1.74	96533.8	2.32		8.81	8.79	8.83	8407.12	0.07	6696.14	0.15		8.93	8.91
9.13	9.12	9.14	510.393	0.01	686.333	0.02		8.87	8.85	8.89	9763.76	0.13	5596	0.17		9.06	9.03	9.08	387575	4.85	214401	6.27		9.34	9.32	9.35	6691.39	0.07	4926.95	0.12		9.68	9.66	9.7	10214.2	0.1	7315.97	0.18		8.87	8.85	8.9	22099	0.19	12985.3	0.28		9.05	9.03
9.2	9.17	9.22	392442	4.92	216854	6.36		8.94	8.92	8.97	6564.89	0.09	3975.55	0.12		9.14	9.13	9.15	993.223	0.01	1204.55	0.04		9.39	9.37	9.41	7521.65	0.08	5425.47	0.13		9.82	9.8	9.85	71575.7	0.73	41300.2	0.99		8.94	8.92	8.96	5500.81	0.05	3707.11	0.08		9.13	9.11
9.29	9.27	9.31	3962.87	0.05	2888.15	0.08		9.06	9.04	9.08	364952	4.92	203190	6.06		9.2	9.18	9.23	413445	5.18	227160	6.64		9.44	9.42	9.45	777.463	0.01	669.51	0.02		9.98	9.95	10	159147	1.63	88588.5	2.13		9.06	9.03	9.08	548166	4.76	300808	6.53		9.2	9.18
9.34	9.33	9.35	221.456	0	259.55	0.01		9.14	9.13	9.14	279.475	0	426.215	0.01		9.29	9.28	9.31	3661.44	0.05	2771.09	0.08		9.52	9.5	9.55	54702.4	0.55	32695	0.81		10.05	10.04	10.06	328.444	0	372.14	0.01		9.2	9.18	9.23	550583	4.78	299823	6.51		9.28	9.27
9.41	9.38	9.45	44861.1	0.56	17701.5	0.52		9.2	9.18	9.23	390533	5.26	215788	6.43		9.35	9.33	9.36	337.548	0	374.574	0.01		9.61	9.58	9.63	226102	2.28	126786	3.13		10.12	10.09	10.14	33544.4	0.34	20249.3	0.49		9.29	9.27	9.3	2071.13	0.02	1928.13	0.04		9.34	9.33
9.52	9.5	9.55	35031.6	0.44	20769.3	0.61		9.29	9.27	9.31	1937.3	0.03	1603.7	0.05		9.42	9.38	9.46	43474.7	0.54	14410.4	0.42		9.68	9.67	9.71	10384.8	0.1	7175.35	0.18		10.17	10.16	10.18	111.759	0	160.477	0		9.34	9.33	9.36	7750.74	0.07	5719.13	0.12		9.38	9.37
9.61	9.58	9.63	198684	2.49	112255	3.29		9.38	9.36	9.41	21340.8	0.29	12206.4	0.36		9.53	9.51	9.55	36524.5	0.46	21851.3	0.64		9.81	9.79	9.84	82772.4	0.84	46746.2	1.15		10.24	10.21	10.26	25264.5	0.26	13755.2	0.33		9.39	9.38	9.41	8090.75	0.07	5931.8	0.13		9.44	9.41
9.69	9.67	9.71	1813.02	0.02	1414.56	0.04		9.46	9.44	9.48	18873	0.25	11078.9	0.33		9.61	9.59	9.64	172676	2.16	97615.1	2.85		9.97	9.94	9.99	148781	1.5	83426.3	2.06		10.34	10.32	10.35	3000.97	0.03	2349.4	0.06		9.45	9.43	9.47	1162.7	0.01	834.176	0.02		9.52	9.5
9.82	9.79	9.84	53843.4	0.68	30025.7	0.88		9.53	9.51	9.55	28584.9	0.39	18294.1	0.55		9.7	9.68	9.71	2207.56	0.03	1655.64	0.05		10.04	10.02	10.06	4915.46	0.05	3917.42	0.1		10.39	10.37	10.4	5138.3	0.05	4274.98	0.1		9.53	9.51	9.55	52985.8	0.46	31927.8	0.69		9.6	9.58
9.97	9.94	9.99	100693	1.26	56458.5	1.66		9.61	9.58	9.63	160396	2.16	91278.8	2.72		9.82	9.8	9.85	48297.5	0.6	27294.8	0.8		10.1	10.09	10.12	1072.93	0.01	976.103	0.02		10.44	10.42	10.47	67354.7	0.69	42598.9	1.03		9.61	9.59	9.64	194922	1.69	110118	2.39		9.82	9.79
10.04	10.02	10.06	3879.57	0.05	3027.64	0.09		9.69	9.67	9.7	1557.53	0.02	1296.53	0.04		9.97	9.95	10	102646	1.28	57579	1.68		10.15	10.13	10.18	9410.89	0.1	5615.13	0.14		10.5	10.49	10.51	701.456	0.01	933.849	0.02		9.69	9.67	9.71	11849	0.1	8036.55	0.17		9.97	9.94
10.11	10.09	10.12	2576.41	0.03	1938.7	0.06		9.82	9.8	9.85	49472.8	0.67	27362.4	0.82		10.05	10.03	10.06	2921.86	0.04	2400.15	0.07		10.23	10.21	10.26	32409.7	0.33	17898.2	0.44		10.56	10.54	10.59	282691	2.9	155216	3.74		9.82	9.8	9.85	76782.9	0.67	42807.9	0.93		10.1	10.08
10.16	10.14	10.18	3344.03	0.04	2210.02	0.06		9.97	9.95	10	101555	1.37	56570.9	1.69		10.12	10.1	10.15	30501.8	0.38	16805.3	0.49		10.33	10.3	10.35	28548.6	0.29	14588.2	0.36		10.66	10.64	10.68	3031.84	0.03	2076.57	0.05		9.97	9.95	10	163336	1.42	91588.6	1.99		10.16	10.15
10.23	10.21	10.25	31754.9	0.4	18025.9	0.53		10.04	10.03	10.06	1316.61	0.02	1288.23	0.04		10.24	10.21	10.26	32909.4	0.41	18569	0.54		10.45	10.43	10.48	78542.4	0.79	42331.3	1.04		10.79	10.76	10.82	6841.87	0.07	3425.57	0.08		10.05	10.03	10.06	2464.42	0.02	2188.51	0.05		10.23	10.21
10.32	10.3	10.35	90177.9	1.13	47843.1	1.4		10.12	10.09	10.14	21437.1	0.29	12474	0.37		10.33	10.31	10.36	44405.6	0.56	23163.4	0.68		10.55	10.53	10.58	304778	3.08	167137	4.12		10.9	10.87	10.92	24789	0.25	12564	0.3		10.12	10.1	10.15	48092.1	0.42	26828.8	0.58		10.33	10.3
10.46	10.43	10.5	85646.8	1.07	34079.6	1		10.23	10.21	10.26	30442.5	0.41	17199.1	0.51		10.4	10.39	10.4	34.672	0	71.871	0		10.65	10.63	10.67	3185.93	0.03	2263.1	0.06		10.99	10.98	11.02	1141.58	0.01	758.112	0.02		10.24	10.21	10.26	31607.5	0.27	17103.2	0.37		10.44	10.42
10.55	10.53	10.58	223063	2.8	125049	3.67		10.33	10.31	10.36	42272.9	0.57	23485.4	0.7		10.47	10.44	10.5	87215	1.09	34651.7	1.01		10.79	10.76	10.81	6814.36	0.07	3634.42	0.09		11.13	11.1	11.15	138110	1.41	77422.6	1.86		10.34	10.31	10.36	6845.02	0.06	4291.41	0.09		10.49	10.47
10.65	10.63	10.67	12275.4	0.15	7344.91	0.22		10.45	10.43	10.47	47552.2	0.64	28563.4	0.85		10.56	10.54	10.59	218287	2.73	123240	3.6		10.89	10.86	10.92	32628.1	0.33	13962.3	0.34		11.31	11.28	11.33	195781	2.01	108401	2.61		10.39	10.38	10.41	6740.36	0.06	5432.89	0.12		10.56	10.53
10.79	10.77	10.81	4397.12	0.06	2573.08	0.08		10.56	10.54	10.58	212087	2.86	118936	3.55		10.66	10.64	10.68	11020	0.14	6743.04	0.2		10.99	10.97	11.02	4608.53	0.05	2675.46	0.07		11.42	11.4	11.43	1263.86	0.01	1153.41	0.03		10.46	10.44	10.5	108255	0.94	47451.3	1.03		10.65	10.63
10.9	10.86	10.93	21242.9	0.27	9268.26	0.27		10.65	10.63	10.68	10388.9	0.14	6405.55	0.19		10.8	10.77	10.82	5150.69	0.06	2990.78	0.09		11.12	11.1	11.15	137505	1.39	76554.4	1.89		11.48	11.46	11.51	51996.9	0.53	28368.4	0.68		10.56	10.54	10.59	306947	2.66	169806	3.68		10.74	10.72
11	10.97	11.02	4509.6	0.06	2539.07	0.07		10.8	10.77	10.82	6120.07	0.08	3604.39	0.11		10.9	10.87	10.93	18232.5	0.23	8655.08	0.25		11.32	11.3	11.35	179888	1.82	99535.9	2.46		11.6	11.58	11.62	4812.42	0.05	3031.99	0.07		10.65	10.64	10.67	1983.44	0.02	1533.29	0.03		10.79	10.77
11.13	11.1	11.15	119451	1.5	66928.1	1.96		10.9	10.87	10.92	16978.2	0.23	8384.37	0.25		11	10.98	11.03	4229.9	0.05	2350.95	0.07		11.41	11.39	11.43	3761.63	0.04	3030.69	0.07		11.66	11.64	11.68	1126.93	0.01	902.274	0.02		10.79	10.75	10.82	8562.82	0.07	3522.59	0.08		10.88	10.85
11.33	11.31	11.35	153895	1.93	85058.3	2.49		11	10.97	11.02	2734.8	0.04	1599.07	0.05		11.13	11.11	11.16	124023	1.55	69540.1	2.03		11.48	11.46	11.51	43832	0.44	24129.5	0.6		11.7	11.69	11.71	56.862	0	91.701	0		10.9	10.87	10.93	31272.2	0.27	14026.1	0.3		10.99	10.97
11.41	11.4	11.43	1620.7	0.02	1505.62	0.04		11.13	11.1	11.15	118342	1.6	66370.6	1.98		11.33	11.31	11.36	161127	2.02	89161.5	2.61		11.59	11.57	11.62	3882.53	0.04	2243.37	0.06		11.77	11.74	11.79	53583.2	0.55	28970.8	0.7		11	10.98	11.03	4416.12	0.04	2490.32	0.05		11.06	11.04
11.48	11.46	11.51	46811.8	0.59	24242	0.71		11.32	11.29	11.34	158615	2.14	87193.1	2.6		11.42	11.4	11.43	1215.4	0.02	1174.64	0.03		11.67	11.67	11.68	13.167	0	26.248	0		11.88	11.84	11.9	7189.48	0.07	3067.95	0.07		11.13	11.11	11.16	146037	1.27	81857	1.78		11.12	11.1
11.59	11.56	11.63	5981.29	0.08	2427.61	0.07		11.41	11.4	11.43	1282.44	0.02	1169.04	0.03		11.49	11.46	11.51	49564.5	0.62	26010.4	0.76		11.75	11.72	11.78	75462.7	0.76	40624	1		11.99	11.96	12.02	33759.1	0.35	16297.4	0.39		11.33	11.31	11.35	192391	1.67	107850	2.34		11.32	11.3
11.75	11.72	11.77	25612.9	0.32	13706.5	0.4		11.48	11.46	11.51	48338.8	0.65	26177.2	0.78		11.59	11.57	11.63	6044.12	0.08	2855.24	0.08		11.86	11.84	11.88	4313.04	0.04	2553.23	0.06		12.09	12.07	12.11	14610.7	0.15	8078.77	0.19		11.42	11.4	11.43	1564.77	0.01	1480.12	0.03		11.48	11.45
11.85	11.83	11.87	2894.59	0.04	1667.66	0.05		11.59	11.57	11.61	3138.31	0.04	1977.26	0.06		11.76	11.73	11.78	17922.3	0.22	9420.4	0.28		11.97	11.92	12.02	69622.7	0.7	17887.5	0.44		12.22	12.2	12.24	5739.6	0.06	3776.66	0.09		11.49	11.46	11.51	48240.3	0.42	25817.7	0.56		11.57	11.55
11.98	11.92	12.03	54177.2	0.68	12299.6	0.36		11.66	11.64	11.68	871.969	0.01	594.503	0.02		11.86	11.83	11.88	3204.68	0.04	1764.36	0.05		12.08	12.06	12.11	13876.2	0.14	7996.55	0.2		12.28	12.26	12.31	16368.7	0.17	9510.49	0.23		11.59	11.57	11.62	6256.84	0.05	3508.66	0.08		11.67	11.65
12.08	12.06	12.11	9454.22	0.12	5572.28	0.16		11.76	11.73	11.79	17854.1	0.24	9110.53	0.27		11.94	11.93	11.96	652.589	0.01	599.072	0.02		12.21	12.19	12.24	8837.81	0.09	4955.64	0.12		12.43	12.41	12.46	5884.83	0.06	2993.36	0.07		11.67	11.65	11.69	2705.09	0.02	1753.76	0.04		11.75	11.72
12.21	12.19	12.23	1944.59	0.02	1500.55	0.04		11.86	11.83	11.89	3596.32	0.05	1734.07	0.05		12	11.97	12.04	19536.2	0.24	8166.49	0.24		12.29	12.27	12.32	17411.5	0.18	9691.55	0.24		12.51	12.49	12.53	833.368	0.01	523.941	0.01		11.76	11.73	11.78	54714.1	0.47	28669.1	0.62		11.84	11.82
12.3	12.28	12.33	17587.5	0.22	9470.18	0.28		12	11.97	12.03	18673.4	0.25	9003.29	0.27		12.09	12.07	12.11	9776.27	0.12	5806.46	0.17		12.42	12.4	12.44	3980.24	0.04	2244.55	0.06		12.6	12.57	12.64	34389.7	0.35	15398.5	0.37		11.86	11.84	11.89	5990.61	0.05	3277.23	0.07		11.92	11.9
12.41	12.39	12.44	2663.76	0.03	1659.05	0.05		12.09	12.06	12.11	9421.67	0.13	5473.67	0.16		12.22	12.2	12.24	4038.34	0.05	2752.22	0.08		12.5	12.49	12.52	440.067	0	412.509	0.01		12.73	12.7	12.75	844.021	0.01	424.306	0.01		11.95	11.93	11.97	4388.9	0.04	3088.09	0.07		12	11.96
12.51	12.49	12.52	465.626	0.01	426.707	0.01		12.23	12.2	12.25	4985.56	0.07	3059.18	0.09		12.3	12.28	12.33	22484.6	0.28	11698.5	0.34		12.57	12.55	12.61	22562.5	0.23	10722.1	0.26		12.86	12.84	12.89	20681.9	0.21	10613.3	0.26		12	11.97	12.03	15382.1	0.13	7188.13	0.16		12.08	12.06
12.57	12.54	12.6	11383.5	0.14	5974.36	0.18		12.29	12.27	12.32	15539.6	0.21	8653.69	0.26		12.42	12.4	12.45	4268.27	0.05	2364.72	0.07		12.74	12.72	12.76	508.213	0.01	321.213	0.01		13	12.97	13.02	153934	1.58	82805.5	1.99		12.09	12.07	12.11	15033	0.13	8791.37	0.19		12.14	12.13
12.75	12.72	12.78	2312.18	0.03	960.177	0.03		12.43	12.4	12.45	4115.37	0.06	2188.29	0.07		12.51	12.5	12.53	1060.92	0.01	855.257	0.02		12.85	12.83	12.88	22389.4	0.23	11502	0.28		13.1	13.08	13.13	3977.22	0.04	2357.56	0.06		12.16	12.15	12.17	73.81	0	100.03	0		12.21	12.18
12.85	12.83	12.88	14889.5	0.19	8091.59	0.24		12.51	12.49	12.53	2263.51	0.03	1524.9	0.05		12.58	12.56	12.61	15306.7	0.19	7592.56	0.22		12.98	12.96	13.01	143084	1.45	77442.9	1.91		13.18	13.16	13.2	3396.59	0.03	2157.85	0.05		12.22	12.2	12.24	8928.2	0.08	5115.17	0.11		12.29	12.27
12.98	12.96	13.01	113501	1.42	59939.9	1.76		12.59	12.56	12.62	21095.8	0.28	9204.43	0.27		12.75	12.73	12.79	1937.41	0.02	797.845	0.02		13.1	13.08	13.12	1011.14	0.01	716.309	0.02		13.26	13.23	13.29	10582.8	0.11	5368.42	0.13		12.3	12.28	12.33	19222.3	0.17	10770.7	0.23		12.41	12.39
13.18	13.16	13.2	2664.93	0.03	1741.25	0.05		12.74	12.72	12.77	1161.17	0.02	605.619	0.02		12.86	12.84	12.89	16209.6	0.2	8485.2	0.25		13.18	13.16	13.2	2436.21	0.02	1620.54	0.04		13.33	13.32	13.34	126.531	0	169.678	0		12.42	12.4	12.45	6570.98	0.06	3318.64	0.07		12.5	12.49
13.24	13.22	13.26	2551.07	0.03	1470.11	0.04		12.85	12.83	12.87	5546.47	0.07	3912.91	0.12		12.99	12.97	13.02	119383	1.49	62976.6	1.84		13.26	13.24	13.29	2030.05	0.02	1285.57	0.03		13.37	13.35	13.4	10489.5	0.11	6480.62	0.16		12.51	12.5	12.53	756.997	0.01	667.05	0.01		12.58	12.55
13.37	13.34	13.39	17121.6	0.21	8675.38	0.25		12.92	12.9	12.93	2253.14	0.03	1677.36	0.05		13.11	13.09	13.13	1256.89	0.02	782.833	0.02		13.31	13.3	13.32	125.932	0	157.736	0		13.44	13.42	13.46	2165.82	0.02	1418.77	0.03		12.58	12.56	12.61	26846.3	0.23	12999.6	0.28		12.73	12.71
13.51	13.49	13.53	3167.36	0.04	1989.3	0.06		12.99	12.97	13.02	105498	1.42	56370.9	1.68		13.18	13.16	13.2	2389.65	0.03	1574.93	0.05		13.37	13.34	13.4	17446.6	0.18	8416.49	0.21		13.52	13.5	13.54	1788.98	0.02	1258.21	0.03		12.7	12.69	12.71	34.659	0	43.834	0		12.85	12.83
13.63	13.6	13.66	1.59061e+06	19.95	659369	19.34		13.1	13.08	13.13	1142.37	0.02	745.021	0.02		13.25	13.22	13.27	3232.72	0.04	1795.11	0.05		13.51	13.49	13.53	3353.01	0.03	2112.46	0.05		13.57	13.55	13.58	801.365	0.01	821.609	0.02		12.75	12.73	12.76	65.169	0	60.442	0		12.98	12.95
13.75	13.73	13.78	25229.7	0.32	13918.8	0.41		13.18	13.16	13.2	3618.51	0.05	2198.42	0.07		13.38	13.35	13.4	16859.1	0.21	8478.2	0.25		13.63	13.6	13.67	1.67039e+06	16.88	650686	16.05		13.65	13.62	13.68	1.63971e+06	16.79	648424	15.61		12.86	12.84	12.89	25052.6	0.22	12866.8	0.28		13.1	13.08
13.91	13.89	13.94	30009.6	0.38	16243.8	0.48		13.25	13.23	13.27	3801.62	0.05	2113.11	0.06		13.52	13.5	13.54	2994.89	0.04	1897.13	0.06		13.75	13.73	13.78	33295.7	0.34	18488.9	0.46		13.77	13.74	13.79	106996	1.1	58640.2	1.41		12.99	12.96	13.01	158179	1.37	85172.7	1.85		13.18	13.16
14	13.98	14.02	1178.12	0.01	776.397	0.02		13.32	13.31	13.32	10.624	0	24.557	0		13.64	13.61	13.67	1.60507e+06	20.09	665870	19.46		13.84	13.83	13.85	15.008	0	27.078	0		13.86	13.85	13.87	61.861	0	86.239	0		13.11	13.09	13.13	3887.52	0.03	2274.08	0.05		13.24	13.22
14.08	14.05	14.1	7675.02	0.1	4333.07	0.13		13.37	13.35	13.4	12091.1	0.16	6173.54	0.18		13.76	13.74	13.79	25807.1	0.32	14253.1	0.42		13.91	13.89	13.94	37159	0.38	20109.2	0.5		13.93	13.91	13.96	179682	1.84	96643.1	2.33		13.18	13.16	13.2	1682.14	0.01	1186.78	0.03		13.31	13.3
14.17	14.14	14.2	5158.61	0.06	2672.45	0.08		13.52	13.5	13.54	2097.65	0.03	1385.35	0.04		13.92	13.9	13.95	30859.8	0.39	16698.5	0.49		14.01	13.99	14.03	2068.74	0.02	1314.23	0.03		14.03	14.01	14.05	985.672	0.01	759.409	0.02		13.25	13.22	13.27	4592.6	0.04	2665.55	0.06		13.37	13.34
14.28	14.25	14.3	127117	1.59	67932.7	1.99		13.64	13.61	13.67	1.57073e+06	21.17	654961	19.53		14.02	14	14.04	1225.47	0.02	815.082	0.02		14.08	14.06	14.1	8145.5	0.08	4448.13	0.11		14.09	14.07	14.12	8912.32	0.09	4920.03	0.12		13.32	13.31	13.33	342.945	0	369.342	0.01		13.51	13.49
14.42	14.38	14.48	32549.4	0.41	8257.31	0.24		13.76	13.74	13.79	24201.6	0.33	13347.4	0.4		14.09	14.06	14.11	7932.06	0.1	4452.2	0.13		14.17	14.15	14.2	5051.64	0.05	2645.43	0.07		14.18	14.16	14.21	2934.26	0.03	1641.63	0.04		13.37	13.35	13.4	19913.2	0.17	9732.67	0.21		13.63	13.6
14.56	14.54	14.58	2786.51	0.03	1624.68	0.05		13.85	13.84	13.86	38.424	0	49.901	0		14.18	14.16	14.21	4510.48	0.06	2365.61	0.07		14.28	14.26	14.31	145617	1.47	77735.7	1.92		14.3	14.28	14.33	149780	1.53	79966.1	1.93		13.52	13.5	13.54	4018.17	0.03	2506.38	0.05		13.75	13.73
14.65	14.63	14.68	25848	0.32	13894.7	0.41		13.92	13.9	13.95	29512	0.4	15971.6	0.48		14.29	14.26	14.31	128832	1.61	69297.8	2.02		14.41	14.38	14.43	12487.4	0.13	6545.81	0.16		14.43	14.4	14.45	13284.5	0.14	6940.71	0.17		13.64	13.61	13.67	1.83422e+06	15.91	733565	15.92		13.84	13.83
14.74	14.72	14.75	303.286	0	249.778	0.01		14.02	14	14.04	1126.42	0.02	781.795	0.02		14.42	14.39	14.44	5789.05	0.07	3443.84	0.1		14.46	14.45	14.48	442.694	0	371.81	0.01		14.49	14.48	14.52	1963.48	0.02	1311.89	0.03		13.76	13.73	13.78	113621	0.99	62293.3	1.35		13.91	13.89
14.79	14.77	14.81	358.417	0	248.502	0.01		14.09	14.06	14.12	9952.42	0.13	5133.93	0.15		14.47	14.45	14.49	4339.87	0.05	2577.23	0.08		14.57	14.55	14.59	1688.08	0.02	1007.51	0.02		14.68	14.65	14.7	35722.7	0.37	19211.4	0.46		13.92	13.9	13.95	188000	1.63	101759	2.21		14.01	13.99
14.89	14.86	14.92	1322.32	0.02	614.299	0.02		14.19	14.16	14.22	3568.97	0.05	1706.47	0.05		14.58	14.55	14.6	9520.42	0.12	5085.01	0.15		14.66	14.63	14.68	35289.7	0.36	18964.1	0.47		14.76	14.75	14.77	68.149	0	78.895	0		14.02	14	14.04	1965.48	0.02	1296.33	0.03		14.08	14.05
15.01	14.99	15.04	4532.82	0.06	2598.71	0.08		14.29	14.27	14.32	123148	1.66	66204.2	1.97		14.66	14.64	14.69	25679.3	0.32	13991.4	0.41		14.74	14.73	14.75	104.275	0	110.931	0		14.81	14.79	14.83	771.735	0.01	495.678	0.01		14.09	14.06	14.11	7536.6	0.07	4258.14	0.09		14.18	14.15
15.13	15.11	15.15	553.153	0.01	345.437	0.01		14.42	14.4	14.44	5213.52	0.07	3124.51	0.09		14.75	14.73	14.77	330.534	0	271.668	0.01		14.79	14.77	14.81	786.275	0.01	499.305	0.01		14.94	14.91	14.96	800.425	0.01	455.111	0.01		14.18	14.15	14.21	5707.58	0.05	2854.24	0.06		14.28	14.26
15.21	15.2	15.22	223.195	0	270.159	0.01		14.48	14.45	14.5	5193.99	0.07	3014.93	0.09		14.8	14.78	14.82	378.188	0	263.296	0.01		14.89	14.86	14.93	1041.28	0.01	387.282	0.01		15.04	15.02	15.07	6440.04	0.07	3609.78	0.09		14.29	14.26	14.31	159875	1.39	85956.2	1.87		14.4	14.39
15.28	15.25	15.3	86986.2	1.09	46171.4	1.35		14.59	14.57	14.62	7038.75	0.09	4092.74	0.12		14.9	14.87	14.93	1472.12	0.02	607.454	0.02		15.02	14.99	15.04	5909.31	0.06	3408.35	0.08		15.11	15.1	15.12	46.38	0	56.489	0		14.41	14.39	14.44	13655	0.12	7293.83	0.16		14.46	14.44
15.42	15.39	15.46	6915.37	0.09	2853.94	0.08		14.67	14.64	14.69	22948.9	0.31	12673	0.38		15.02	15	15.05	4625.92	0.06	2668.57	0.08		15.08	15.07	15.09	30.432	0	42.031	0		15.17	15.15	15.2	804.975	0.01	431.361	0.01		14.47	14.46	14.49	699.107	0.01	554.507	0.01		14.57	14.54
15.52	15.49	15.55	4550.51	0.06	1979.41	0.06		14.75	14.74	14.77	280.118	0	234.019	0.01		15.08	15.07	15.09	37.865	0	47.701	0		15.14	15.12	15.16	841.333	0.01	543.547	0.01		15.24	15.24	15.25	114.312	0	168.558	0		14.57	14.56	14.59	207.602	0	179.691	0		14.65	14.63
15.66	15.64	15.69	4619.21	0.06	2225.41	0.07		14.8	14.79	14.82	346.33	0	242.106	0.01		15.15	15.12	15.17	761.742	0.01	473.252	0.01		15.21	15.2	15.23	218.991	0	275.791	0.01		15.31	15.29	15.34	118902	1.22	63532.7	1.53		14.66	14.64	14.69	38187.4	0.33	20541.2	0.45		14.75	14.72
15.8	15.78	15.81	112.599	0	92.662	0		14.91	14.87	14.94	1347.97	0.02	464.297	0.01		15.22	15.21	15.23	206.094	0	254.648	0.01		15.28	15.26	15.31	119948	1.21	63183.1	1.56		15.46	15.43	15.49	5159.23	0.05	2684.56	0.06		14.75	14.73	14.76	131.701	0	135.12	0		14.88	14.86
15.87	15.84	15.9	4092.9	0.05	2127.36	0.06		15.03	15.01	15.05	4633.42	0.06	2635.92	0.08		15.29	15.26	15.31	88172.2	1.1	47039.1	1.37		15.44	15.4	15.47	7742.65	0.08	3324.06	0.08		15.55	15.53	15.58	3480.58	0.04	1963.07	0.05		14.8	14.78	14.82	971.526	0.01	601.449	0.01		15.01	14.99
16.02	15.99	16.06	2280.86	0.03	900.165	0.03		15.09	15.08	15.1	68.49	0	74.223	0		15.43	15.4	15.46	6240.25	0.08	2881.71	0.08		15.52	15.5	15.55	2888.24	0.03	1499.56	0.04		15.62	15.6	15.64	1156.51	0.01	760.872	0.02		14.91	14.87	14.94	1545.6	0.01	613.541	0.01		15.13	15.11
16.12	16.09	16.15	2571.39	0.03	1290.22	0.04		15.15	15.13	15.18	841.667	0.01	506.717	0.02		15.53	15.5	15.57	5714.07	0.07	2383.23	0.07		15.67	15.65	15.7	5840.09	0.06	2829.33	0.07		15.7	15.68	15.73	5984.84	0.06	2868.5	0.07		15.02	15	15.05	6692.76	0.06	3837.6	0.08		15.21	15.2
16.22	16.2	16.25	799.822	0.01	431.88	0.01		15.23	15.22	15.24	186.661	0	234.542	0.01		15.68	15.65	15.71	4837.72	0.06	2420.79	0.07		15.81	15.8	15.82	97.057	0	90.216	0		15.84	15.82	15.85	275.953	0	203.933	0		15.08	15.07	15.09	32.659	0	45.839	0		15.28	15.26
16.34	16.29	16.39	1758.75	0.02	428.402	0.01		15.3	15.27	15.32	85636.7	1.15	45705.5	1.36		15.82	15.8	15.83	297.271	0	216.668	0.01		15.88	15.85	15.9	4445.21	0.04	2326.32	0.06		15.94	15.89	15.97	6403.11	0.07	2114.17	0.05		15.15	15.13	15.17	1154.97	0.01	729.524	0.02		15.43	15.4
16.45	16.42	16.47	997.283	0.01	570.263	0.02		15.44	15.41	15.47	5670.32	0.08	2633.54	0.08		15.89	15.86	15.91	3804.55	0.05	1949.97	0.06		16.02	15.99	16.06	5178.36	0.05	2251.84	0.06		16.03	16.01	16.05	337.785	0	253.192	0.01		15.22	15.21	15.23	190.601	0	249.909	0.01		15.52	15.5
16.52	16.5	16.55	637.121	0.01	299.463	0.01		15.55	15.51	15.58	5304.79	0.07	2177.65	0.06		16.01	15.99	16.02	69.191	0	62.966	0		16.13	16.1	16.16	2296.18	0.02	1155.33	0.03		16.09	16.07	16.11	827.224	0.01	535.872	0.01		15.29	15.26	15.32	121820	1.06	64196.4	1.39		15.57	15.56
16.63	16.6	16.65	18055	0.23	9437.32	0.28		15.69	15.66	15.72	4809.59	0.06	2374.33	0.07		16.06	16.04	16.08	341.191	0	229.029	0.01		16.23	16.2	16.25	1075.9	0.01	594.131	0.01		16.17	16.14	16.2	3028.31	0.03	1422.79	0.03		15.44	15.41	15.47	5955.49	0.05	2935.74	0.06		15.67	15.64
16.81	16.78	16.83	590.555	0.01	305.949	0.01		15.83	15.81	15.84	360.013	0	248.355	0.01		16.13	16.11	16.16	2994.06	0.04	1466.91	0.04		16.31	16.29	16.34	681.801	0.01	392.103	0.01		16.28	16.26	16.31	754.711	0.01	337.418	0.01		15.52	15.5	15.55	4866.63	0.04	2556.81	0.06		15.87	15.85
16.92	16.89	16.94	11914.6	0.15	6401.29	0.19		15.9	15.88	15.94	4444.16	0.06	1928.65	0.06		16.24	16.21	16.27	749.733	0.01	391.181	0.01		16.39	16.37	16.41	218.041	0	156.177	0		16.42	16.4	16.44	486.34	0	282.229	0.01		15.59	15.57	15.61	654.841	0.01	451.866	0.01		16.01	15.99
17.27	17.25	17.3	6443.15	0.08	3392.37	0.1		16.01	16	16.03	128.941	0	104.5	0		16.36	16.32	16.4	1245.64	0.02	398.162	0.01		16.46	16.43	16.48	894.6	0.01	501.155	0.01		16.5	16.48	16.52	658.366	0.01	384.406	0.01		15.68	15.66	15.71	6242.73	0.05	3244.79	0.07		16.13	16.1
17.36	17.34	17.38	220.451	0	144.771	0		16.07	16.05	16.09	373.665	0.01	245.073	0.01		16.46	16.44	16.49	1041.95	0.01	584.021	0.02		16.63	16.61	16.66	15935.9	0.16	8391.91	0.21		16.6	16.59	16.61	48.504	0	55.549	0		15.82	15.8	15.83	290.435	0	216.477	0		16.23	16.2
17.44	17.41	17.47	465.864	0.01	206.56	0.01		16.15	16.12	16.18	3214.5	0.04	1547.89	0.05		16.54	16.52	16.57	599.272	0.01	265.304	0.01		16.82	16.79	16.85	597.276	0.01	291.749	0.01		16.68	16.65	16.7	16145.9	0.17	8618.51	0.21		15.89	15.86	15.91	3560.2	0.03	1875.87	0.04		16.32	16.29
17.51	17.5	17.53	113.314	0	80.56	0		16.26	16.23	16.28	702.35	0.01	360.707	0.01		16.64	16.62	16.67	17983.1	0.23	9477.51	0.28		16.93	16.91	16.96	6658.32	0.07	3580.57	0.09		16.87	16.84	16.89	1008.23	0.01	468.217	0.01		16.01	15.99	16.02	160.994	0	139.234	0		16.45	16.42
17.61	17.59	17.63	730.22	0.01	502.692	0.01		16.39	16.36	16.42	470.809	0.01	225.299	0.01		16.82	16.8	16.85	659.879	0.01	323.486	0.01		17.28	17.26	17.31	5642.92	0.06	2989.89	0.07		16.99	16.96	17.02	4565.98	0.05	1998.87	0.05		16.06	16.04	16.08	668.125	0.01	442.215	0.01		16.53	16.5
17.66	17.64	17.69	654.048	0.01	417.761	0.01		16.48	16.45	16.5	886.274	0.01	503.508	0.02		16.93	16.91	16.96	11900.7	0.15	6438.52	0.19		17.37	17.35	17.39	255.257	0	170.777	0		17.11	17.09	17.13	100.91	0	63.454	0		16.14	16.11	16.16	3002.81	0.03	1509.37	0.03		16.63	16.61
17.81	17.78	17.83	4991.31	0.06	2861.72	0.08		16.56	16.53	16.59	546.303	0.01	229.912	0.01		17.29	17.26	17.32	7057.37	0.09	3741.06	0.11		17.44	17.42	17.47	666.595	0.01	312.596	0.01		17.26	17.25	17.28	113.721	0	98.674	0		16.24	16.21	16.27	1021.16	0.01	495.104	0.01		16.81	16.79
17.89	17.87	17.9	337.611	0	287.097	0.01		16.65	16.63	16.68	17084.4	0.23	9113.59	0.27		17.37	17.35	17.39	252.904	0	169.462	0		17.52	17.51	17.54	130.071	0	92.006	0		17.33	17.31	17.36	5361.06	0.05	2898.07	0.07		16.33	16.31	16.35	156.278	0	96.087	0		16.92	16.9
17.94	17.92	17.96	973.134	0.01	637.865	0.02		16.85	16.82	16.87	863.574	0.01	439.266	0.01		17.45	17.42	17.48	681.811	0.01	356.696	0.01		17.62	17.6	17.64	1026.68	0.01	688.949	0.02		17.41	17.4	17.43	187.602	0	145.22	0		16.39	16.37	16.41	111.783	0	82.95	0		17.19	17.17
18.02	17.99	18.04	1277.54	0.02	745.017	0.02		16.95	16.93	16.98	11581.4	0.16	6197.09	0.18		17.53	17.51	17.57	215.516	0	82.76	0		17.68	17.66	17.7	823.466	0.01	534.876	0.01		17.48	17.45	17.5	1229.8	0.01	712.476	0.02		16.46	16.44	16.49	876.129	0.01	503.934	0.01		17.28	17.26
18.07	18.06	18.09	67.998	0	69.8	0		17.23	17.22	17.25	45.557	0	41.404	0		17.62	17.6	17.64	832.64	0.01	558.068	0.02		17.82	17.79	17.84	6938.18	0.07	4008.91	0.1		17.56	17.54	17.57	77.6	0	66.22	0		16.64	16.62	16.67	16899.1	0.15	8958.8	0.19		17.37	17.35
18.12	18.11	18.14	43.691	0	42.383	0		17.31	17.28	17.33	7112.47	0.1	3771.85	0.11		17.68	17.66	17.7	761.888	0.01	489.156	0.01		17.9	17.88	17.91	561.336	0.01	450.385	0.01		17.66	17.64	17.68	1533.35	0.02	910.564	0.02		16.83	16.8	16.86	896.945	0.01	395.787	0.01		17.45	17.42
18.27	18.25	18.3	1206.06	0.02	627.891	0.02		17.39	17.37	17.41	246.768	0	174.719	0.01		17.82	17.8	17.84	5190.19	0.06	2997.69	0.09		17.95	17.93	17.97	1000.72	0.01	659.671	0.02		17.73	17.71	17.76	1437.97	0.01	798.71	0.02		16.94	16.91	16.96	3465.62	0.03	1841.26	0.04		17.52	17.5
18.36	18.35	18.38	210.329	0	160.251	0		17.46	17.44	17.48	626.018	0.01	341.597	0.01		17.9	17.89	17.92	353.387	0	300.846	0.01		18.02	18	18.05	1996.89	0.02	1192.42	0.03		17.86	17.83	17.88	7571.64	0.08	4340.01	0.1		17.29	17.27	17.32	5190.04	0.05	2768.37	0.06		17.61	17.6
18.48	18.45	18.51	152676	1.92	73169.7	2.15		17.54	17.53	17.56	60.78	0	52.363	0		17.95	17.93	17.97	922.463	0.01	620.895	0.02		18.08	18.07	18.1	142.368	0	132.101	0		17.93	17.92	17.95	476.052	0	396.474	0.01		17.37	17.35	17.39	296.498	0	200.372	0		17.67	17.65
18.62	18.59	18.64	6583.94	0.08	3470.85	0.1		17.64	17.62	17.66	840.362	0.01	548.448	0.02		18.03	18.01	18.05	1360.99	0.02	794.441	0.02		18.13	18.12	18.15	59.861	0	56.939	0		17.98	17.96	18	694.04	0.01	500.269	0.01		17.45	17.42	17.47	1512.64	0.01	846.243	0.02		17.81	17.79
18.75	18.73	18.78	2061.11	0.03	1029.94	0.03		17.7	17.68	17.72	284.535	0	222.286	0.01		18.09	18.07	18.1	64.685	0	67.041	0		18.29	18.26	18.31	616.574	0.01	399.284	0.01		18.07	18.04	18.09	1940.8	0.02	1159.49	0.03		17.53	17.52	17.57	121.872	0	60.598	0		17.9	17.88
18.83	18.81	18.86	536.335	0.01	281.019	0.01		17.84	17.81	17.86	5675.25	0.08	3166.53	0.09		18.14	18.12	18.15	46.551	0	47.056	0		18.38	18.36	18.4	432.175	0	300.967	0.01		18.12	18.11	18.13	56.784	0	61.549	0		17.62	17.6	17.64	1206.54	0.01	795.365	0.02		18.02	18
18.99	18.96	19.02	1643.13	0.02	641.621	0.02		17.91	17.9	17.93	345.5	0	294.045	0.01		18.19	18.18	18.2	23.29	0	25.063	0		18.49	18.46	18.52	147903	1.49	67587.3	1.67		18.17	18.16	18.19	100.239	0	89.891	0		17.68	17.66	17.71	995.146	0.01	640.755	0.01		18.13	18.11
19.12	19.1	19.14	761.473	0.01	443.643	0.01		17.96	17.94	17.98	921.327	0.01	618.888	0.02		18.24	18.23	18.25	18.9	0	22.212	0		18.64	18.61	18.67	8889.15	0.09	4739.64	0.12		18.33	18.31	18.36	824.703	0.01	493.319	0.01		17.82	17.8	17.85	7775.76	0.07	4522.4	0.1		18.18	18.16
19.21	19.19	19.24	35056.8	0.44	19133.8	0.56		18.04	18.02	18.07	1264.76	0.02	749.679	0.02		18.29	18.27	18.31	671.305	0.01	402.321	0.01		18.77	18.74	18.79	2609.59	0.03	1472.22	0.04		18.41	18.39	18.42	88.297	0	75.896	0		17.9	17.89	17.92	508.564	0	419.091	0.01		18.29	18.27
19.31	19.29	19.34	2581.95	0.03	1436.22	0.04		18.1	18.09	18.11	63.238	0	64.581	0		18.38	18.36	18.4	328.747	0	226.348	0.01		18.85	18.82	18.88	690.826	0.01	324.578	0.01		18.45	18.44	18.47	271.561	0	217.901	0.01		17.95	17.93	17.97	801.074	0.01	562.681	0.01		18.36	18.32
19.57	19.55	19.58	107.971	0	83.689	0		18.15	18.14	18.17	101.167	0	85.96	0		18.42	18.41	18.43	43.358	0	59.792	0		19	18.97	19.02	500.274	0.01	254.375	0.01		18.54	18.51	18.57	158741	1.63	71754.6	1.73		18.03	18.01	18.05	2366.58	0.02	1371.37	0.03		18.49	18.46
19.65	19.61	19.68	815.552	0.01	305.948	0.01		18.2	18.19	18.21	24.02	0	25.57	0		18.5	18.47	18.52	150561	1.88	72555.3	2.12		19.06	19.05	19.07	25.994	0	30.625	0		18.64	18.63	18.66	490.366	0.01	403.796	0.01		18.09	18.07	18.1	218.748	0	188.588	0		18.63	18.61
19.72	19.7	19.75	981.698	0.01	560.129	0.02		18.31	18.29	18.33	392.513	0.01	262.831	0.01		18.64	18.62	18.67	7209.31	0.09	3847.9	0.11		19.14	19.11	19.16	1869.66	0.02	960.632	0.02		18.72	18.69	18.74	8524.34	0.09	4673.33	0.11		18.14	18.13	18.15	58.483	0	58.265	0		18.76	18.74
19.93	19.9	19.97	1961.74	0.02	734.792	0.02		18.39	18.37	18.41	616.735	0.01	357.428	0.01		18.77	18.75	18.79	2020.12	0.03	1164.82	0.03		19.23	19.21	19.26	42191.9	0.43	22843.8	0.56		18.82	18.8	18.84	2611.68	0.03	1565.38	0.04		18.29	18.27	18.31	1055.71	0.01	620.462	0.01		18.89	18.85
20.01	19.99	20.03	227.56	0	148.417	0		18.44	18.42	18.45	140.352	0	133.639	0		18.85	18.83	18.87	380.544	0	241.236	0.01		19.33	19.31	19.36	3428.31	0.03	1934.07	0.05		18.9	18.88	18.92	115.091	0	81.263	0		18.38	18.36	18.4	214.724	0	159.904	0		18.99	18.97
20.17	20.14	20.19	947.605	0.01	506.525	0.01		18.51	18.49	18.54	147742	1.99	71200.7	2.12		18.92	18.89	18.95	634.259	0.01	304.562	0.01		19.42	19.4	19.44	441.67	0	292.82	0.01		18.96	18.95	18.98	184.697	0	125.562	0		18.42	18.42	18.43	17.134	0	30.215	0		19.13	19.11
20.33	20.27	20.42	224018	2.81	39718.5	1.16		18.61	18.6	18.62	35.697	0	49.916	0		19	18.98	19.01	53.77	0	46.968	0		19.53	19.51	19.55	99.698	0	72.876	0		19.08	19.05	19.11	195.099	0	79.606	0		18.5	18.47	18.53	170567	1.48	78541.6	1.7		19.23	19.2
20.47	20.44	20.49	1884.62	0.02	994.802	0.03		18.67	18.65	18.7	8171.33	0.11	4205.3	0.13		19.09	19.08	19.1	24.723	0	26.316	0		19.59	19.57	19.6	48.232	0	53.36	0		19.22	19.2	19.24	733.879	0.01	473.81	0.01		18.65	18.62	18.67	9273.85	0.08	4872.72	0.11		19.32	19.3
20.97	20.95	20.99	105935	1.33	69834.5	2.05		18.79	18.77	18.81	2065.95	0.03	1218.52	0.04		19.14	19.11	19.16	731.278	0.01	421.771	0.01		19.62	19.61	19.64	228.255	0	153.841	0		19.31	19.28	19.33	46497.8	0.48	25195.1	0.61		18.77	18.75	18.8	2546.37	0.02	1489.68	0.03		19.41	19.4
								18.87	18.85	18.89	648.995	0.01	381.057	0.01		19.23	19.21	19.26	36718.7	0.46	20032	0.59		19.68	19.67	19.7	128.286	0	125.19	0		19.41	19.38	19.43	3762.36	0.04	2048.26	0.05		18.84	18.83	18.87	325.831	0	215.648	0		19.73	19.69
								19.04	19	19.09	1545.41	0.02	456.134	0.01		19.33	19.31	19.35	2296.35	0.03	1352.29	0.04		19.74	19.71	19.76	1478.97	0.01	756.836	0.02		19.6	19.59	19.62	46.199	0	36.011	0		18.92	18.9	18.94	429.878	0	232.663	0.01		20	19.96
								19.17	19.15	19.19	602.704	0.01	359.324	0.01		19.42	19.39	19.45	741.877	0.01	350.334	0.01		19.88	19.85	19.9	303.077	0	158.351	0		19.7	19.67	19.72	562.827	0.01	283.605	0.01		19	18.98	19.02	223.398	0	137.405	0		20.2	20.18
								19.26	19.24	19.29	34300.1	0.46	18820.5	0.56		19.61	19.57	19.65	1414.07	0.02	476.896	0.01		20.04	20.02	20.06	247.661	0	174.37	0		19.84	19.82	19.87	3128.66	0.03	1616.33	0.04		19.15	19.13	19.17	877.431	0.01	540.215	0.01		20.35	20.25
								19.36	19.34	19.39	2386.01	0.03	1364.33	0.04		19.75	19.72	19.78	2925.07	0.04	1146.72	0.03		20.22	20.19	20.24	701.331	0.01	406.255	0.01		19.93	19.92	19.94	25.963	0	27.747	0		19.24	19.21	19.26	49287.7	0.43	26886.3	0.58		20.5	20.46
								19.45	19.42	19.47	235.103	0	131.772	0		19.89	19.86	19.91	277.496	0	159.469	0		20.36	20.27	20.46	61825.1	0.62	7953.99	0.2		19.99	19.97	20.02	124.095	0	79.879	0		19.34	19.31	19.36	3760.29	0.03	2105.73	0.05		20.85	20.83
								19.56	19.53	19.58	414.252	0.01	212.989	0.01		20.03	19.99	20.06	2949.03	0.04	1128.53	0.03		20.51	20.48	20.54	2550.13	0.03	1092.25	0.03		20.14	20.11	20.16	1097.75	0.01	539.071	0.01		19.53	19.51	19.54	41.826	0	33.879	0		20.96	20.95
								19.64	19.61	19.68	1291.03	0.02	472.698	0.01		20.2	20.17	20.23	1816.51	0.02	853.775	0.02		20.74	20.72	20.76	444.404	0	286.762	0.01		20.25	20.24	20.27	33.224	0	32.275	0		19.64	19.61	19.68	1053.2	0.01	396.447	0.01
								19.79	19.77	19.81	326.989	0	200.69	0.01		20.28	20.27	20.3	136.058	0	115.829	0		20.96	20.94	20.99	95096.3	0.96	62230.9	1.54		20.36	20.33	20.39	3621.76	0.04	1722.07	0.04		19.75	19.72	19.78	3075.14	0.03	1533.53	0.03
								19.89	19.85	19.94	3188.88	0.04	898.778	0.03		20.45	20.38	20.55	234182	2.93	35730	1.04										20.45	20.43	20.47	246.405	0	149.985	0		19.9	19.87	19.93	574.321	0	270.172	0.01
								20.08	20.06	20.1	286.094	0	172.393	0.01		20.59	20.56	20.62	764.41	0.01	319.949	0.01										20.57	20.55	20.58	40.311	0	33.848	0		20.04	20.02	20.07	1328.95	0.01	679.8	0.01
								20.14	20.11	20.17	359.282	0	165.935	0		20.97	20.95	21	276112	3.46	117697	3.44										20.65	20.62	20.67	916.552	0.01	479.96	0.01		20.13	20.12	20.15	88.747	0	72.672	0
								20.26	20.23	20.29	1526.51	0.02	616.466	0.02																		20.74	20.72	20.75	85.377	0	59.733	0		20.22	20.19	20.25	5469.25	0.05	2626.63	0.06
								20.34	20.33	20.36	126.572	0	91.694	0																		20.96	20.94	20.99	98039.6	1	64109.4	1.54		20.3	20.28	20.32	227.143	0	177.899	0
								20.41	20.39	20.42	37.334	0	31.199	0																										20.46	20.39	20.7	773083	6.71	66334.9	1.44
								20.48	20.46	20.5	176.567	0	105.129	0																										20.97	20.95	20.99	101714	0.88	66997.5	1.45
								20.57	20.54	20.6	2169.94	0.03	1020.64	0.03
								20.66	20.64	20.68	106.19	0	69.405	0
								20.96	20.94	20.98	104715	1.41	70243.5	2.09
								21	20.99	21	30957.1	0.42	80556	2.4
[truncated: 61 more columns]
